# Supplementary material for: Ortho-directed functionalization of arenes using magnesate bases
Source: Royal Society of Chemistry journal article supplement (doi:10.1039/c0cc01731k), 2010-01-01

## Electronic Supplementary Information

# Ortho-directed Functionalization of Arenes using Magnesate Bases

**Estelle Bellamy, Omar Bayh, Christophe Hoarau, François Trécourt, Guy Quéguiner and Francis Marsais**

Institut de Chimie Organique Fine (IRCOF) associé au CNRS (UMR 6014 COBRA), INSA et  
Université de Rouen, BP08 76131 Mont Saint Aignan, France

## Table of contents

|                                                                                  |    |
|----------------------------------------------------------------------------------|----|
| Table of contents.....                                                           | 1  |
| General Information.....                                                         | 2  |
| Preparation of Benzenes Derivatives.....                                         | 2  |
| General Experimental Procedure for Magnesate-Functionalization Reactions.....    | 3  |
| Characterization Data of Products.....                                           | 5  |
| <sup>1</sup> H, <sup>13</sup> C and <sup>19</sup> F NMR Spectra of Products..... | 15 |

## General Information

THF was distilled from benzophenone/Na and used immediately. Water content of the solvent was estimated by the modified Karl Fisher method (less than 60 ppm water). IR spectra were obtained as potassium bromide pellets with a Perkin Elmer Paragon 500 spectrometer. Absorption bands are given in  $\text{cm}^{-1}$ .  $^1\text{H}$  NMR,  $^{13}\text{C}$  NMR and  $^{19}\text{F}$  NMR spectra were recorded in  $\text{CDCl}_3$  with a Bruker Avance 300 spectrometer ( $^1\text{H}$  at 300MHz,  $^{13}\text{C}$  at 75.4MHz and  $^{19}\text{F}$  at 282.5MHz). Chemical shift  $\delta$  were reported in ppm relative to the residual solvent peak ( $^1\text{H}$ ,  $\delta=7.26$  or  $^{13}\text{C}$ ,  $\delta=77.16$ ). Melting points ( $^\circ\text{C}$ ) were measured on a Kofler hot-stage ( $\pm 2^\circ\text{C}$ ) and are uncorrected. Elemental analyses were performed on a Carlo Erba 1106 apparatus or CE Instrument EA 1110 and measurement accuracy is around  $\pm 0.4\%$  on carbon. Column chromatography was performed using silica gel (mesh size 60-80 $\mu\text{m}$ ). Commercially available (4,4'-dimethyloxazolin-2-yl)benzene **1a**, 1,4-dimethoxybenzene **1m** and anisole **1l** were used without further purification.

## Preparation of benzene derivatives 1b-k

### Synthesis of oxazolinylenes **1b-c**:<sup>1a</sup>

Zinc chloride (300 mg, 2 mmol) was placed in a 250 mL round bottom flask, melted three times under high pressure and allowed to cool to room temperature under  $\text{N}_2$  before a solution of 4-chlorobenzonitrile (20 mmol) (respectively 4-methoxybenzonitrile) and 2-amino-2-methylpropane-1-ol (2.87 mL, 30 mmol) in dry chlorobenzene (40 mL) was added. The resulting mixture was refluxed for 48h. The volatiles were removed under vacuum and water (30 mL) was added. The aqueous layer was extracted with  $\text{CH}_2\text{Cl}_2$  and the combined organic extracts were washed with water, brine, dried ( $\text{MgSO}_4$ ) and concentrated in vacuum. The crude product was purified by flash chromatography on silica gel to give 4-chloro-2'-oxazolinylenes **1b** (3.9g, 92%) and **1c** (3.4g, 83% yields). All analyses are in accordance with those described in literature.<sup>1b</sup>

### Synthesis of *N*-tert-butylbenzamides **1d-f** and *N*-cumylbenzamides **1g-i**:<sup>2a</sup>

A solution of benzoyl chloride (10 mmol) (respectively 4-chlorobenzoylchloride, 4-methoxybenzoyl chloride) in THF (30 mL) was added dropwise at  $0^\circ\text{C}$  to a solution of *tert*-butylamine (20 mmol) or cumylamine<sup>2b</sup> in THF (30 mL). After stirring 18h, aq. $\text{K}_2\text{CO}_3$  (2 mL, 2M) was added. The mixture was extracted with  $\text{Et}_2\text{O}$  (20 mL) and the combined organic extracts were washed water and dried ( $\text{MgSO}_4$ ). After filtration, solvents were removed in vacuum to afford crude *N*-tert-butylbenzamide **1d-f** and *N*-cumylbenzamide **1g-i** which was purified by flash chromatography on silica gel using EtOAc and petroleum ether as eluents to give *N*-tert-butylbenzamide **1d** (1.5g, 86%), 4-chloro-*N*-tert-butylbenzamide **1e** (1.9g, 90%), 4-methoxy-*N*-tert-butylbenzamide **1f** (1.8g, 86%), *N*-cumylbenzamide **1g** (1.8g, 76%), 4-

<sup>1</sup> (a) G. K. Jnaneshwara, V. H. Deshpande, M. Lalithambika, T. Ravindranathan, A. V. Bedekar, Tetrahedron Lett., 1998, **39**, 459-462. (b) A. R. Katritzky, C. Cai, K. Suzuki, S. K. Singh, J. Org. Chem., 2004, **69**, 811-814.

<sup>2</sup> (a) Y. Uchida, Y. Kobayashi, S. Kozuka, Bull.Chem. Soc. Jpn., 1981, **54**, 1781-1786. (b) C. Metallinos, S. Nerdinger, V. Snieckus, Org. Lett., 1999, **1**, 1183-1186.

chloro-*N*-cumylbenzamide **1h** (2.2g, 81%), 4-methoxy-*N*-cumylbenzamide **1f** (2.3g, 84%) as white solids. All analyses of products **1d**,<sup>3a</sup> **1e**,<sup>3b</sup> **1f**,<sup>3c</sup> **1g**,<sup>3d</sup> **1i**<sup>3e</sup> are in accordance with those reported in literature data. All analysis of the new compound **1h** is given in the characterization data section.

#### Synthesis of *N*-pivaloylaniline **1k**<sup>4</sup>

A solution of trimethylacetylchloride (6.97 mL, 50 mmol) in CH<sub>2</sub>Cl<sub>2</sub> (30 mL) was added dropwise at 0°C to a solution of aniline (4.55 mL, 50 mmol) and triethylamine (8.7 mL, 60 mmol). The resulting mixture was stirred overnight at room temperature. The solvents are removed under vacuum and the crude product was purified by chromatography on silica gel using EtOAc and petroleum ether as eluents to give pivaloylaminobenzene **1k** (8.6g, 97%) as a white solid. All analyses of product **1k** is given in the characterization data section.<sup>4</sup>

## General Experimental Procedures of Magnesation-Functionalization Reactions

### General procedure for preparation of lithium butylmagnesate bases (procedure 1):

To a suspension of magnesium turning (0.0486g, 2.0 mmol) in THF (10 mL) was added 1,2-dibromoethane (0.17 mL, 2.0 mmol) under N<sub>2</sub>. The mixture was refluxed for 1h to afford a magnesium dibromide (MgBr<sub>2</sub>) as a colourless solution. After cooling at 0°C, the *n*-butyllithium (6 mmol or 8 mmol respectively, 2.5 M in hexanes) was added dropwise and the resulted mixture was stirred at the same temperature for 1 h to give a solution of Bu<sub>3</sub>MgLi and Bu<sub>4</sub>MgLi<sub>2</sub> (0.2 M) respectively.

### General procedure for magnesation of benzene derivatives **1a-m** (procedure 2):

Benzene derivatives **1a-c** (4.8 mmol), **1d-i** (3.6 mmol), **1k** (2mmol) and **1l-m** (6.4 mmol) were added dropwise at room temperature to a selected freshly prepared solution of Bu<sub>3</sub>MgLi or Bu<sub>4</sub>MgLi<sub>2</sub> (see Table 1) (2 mmol) in THF following the above procedure 1. The resulted mixture was stirred at room temperature or at reflux (see Table 1) over a 2h period before the subsequent introduction of the adequate reagents for electrophilic trapping or cross-coupling reactions (The magnesation was previously evaluated by carrying out D<sub>2</sub>O-trapping experiments followed by <sup>1</sup>H NMR analysis of the crude of the deprotonation).

<sup>3</sup> (a) L. Zhang, S. Su, H. Wu, S. Wang, Tetrahedron, 2009, **65**, 10022-10024. (b) M. Achmatowicz, O.R. Thiel, P. Wheeler, C. Bernard, J. Huang, R.D. Larsen, M.M. Paul, J. Org. Chem., 2009, **74**, 795-809. (c) J.C., Baum, J.E., Milne, J.A. Murry, O.R. Thiel, J. Org. Chem. 2009, **74**, 2207-2209. (d) K. Kondo, E. Sekimoto, J. Nakao, Y. Murakami, Tetrahedron, 2000, **56**, 5843-5856. (e) J. Clayden, C. J. Menet, K. Tchabanenko, Tetrahedron, 2002, **58**, 4727-4733.

<sup>4</sup> J. P. Bezombes, P.B. Hitchcock, M.F. Lappert, P. J. Merle, J. Chem. Soc. Dalton Trans., 2001, 816-821.

**General procedure for iodination of benzene derivatives 1a-m (procedure 3):**

To a solution of arylmagnesate in THF (10 mL) under N<sub>2</sub>, prepared by treatment of **1a-m** with a butylmagnesate base following the above general magnesation procedure 2, was added a solution of I<sub>2</sub> (6 or 8 mmol using Bu<sub>3</sub>MgLi or Bu<sub>4</sub>MgLi<sub>2</sub> respectively) in THF (10 mL) at room temperature. After a 2h stirring period, satd. aq.NH<sub>4</sub>Cl (1 mL) and satd.aq.Na<sub>2</sub>S<sub>2</sub>O<sub>3</sub> (5 mL) solutions were successively added. The mixture was extracted with Et<sub>2</sub>O (10 mL) and the combined organic phase were washed with water (10 mL) and brine (10 mL), dried (MgSO<sub>4</sub>) and evaporated under vacuum to give crude iodoaromatics **2a-m**. Procedure of purification and all analysis are reported in the next 'characterization data products' section.

**General procedure for alkylation of benzene derivatives 1a-m (procedure 4):**

To a solution of arylmagnesate in THF (10 mL) under N<sub>2</sub>, prepared by treatment of **1a-m** with a butylmagnesate base following the above general magnesation procedure 2, was added dropwise propylene oxide (6 mmol or 8 mmol respectively) at room temperature. After 2h stirring at room temperature, satd.aq.NH<sub>4</sub>Cl was added (1mL) and MgSO<sub>4</sub> was added. After filtration, the solvent was removed under vacuum to give crude hydroxymethylaromatics **3a-e**. Procedure of purification and all analysis are reported in the next 'characterization data products' section

**General procedure for (hetero)arylation and vinylation of benzene derivatives 1a-m (procedure 5):**

To a solution of arylmagnesate in THF (10 mL) under N<sub>2</sub>, prepared by treatment of **1a-m** with a butylmagnesate base following the above general magnesation procedure 2, cross-coupling partner (2-bromopyridine, 3-iodopyridine, 3-bromoquinoline and 1-methylbromoethene) (6 mmol or 8 mmol respectively) and [1,1'-Bis(diphenylphosphino)ferrocene]palladium (II) chloride (5 mol%) were added. After refluxing for 18h., satd.aq.NH<sub>4</sub>Cl (1 mL) was then added and the resulted mixture was filtered on Celite washed with Et<sub>2</sub>O (40 mL). The solution was dried over MgSO<sub>4</sub>, and after filtration solvents were removed to give crude arylated and vinylated aromatics **4a-d**, **5a-d**, **6a-b**, **7a-d**. Procedure of purification and all analysis are reported in the next 'characterization data products' section

**General procedure for oxydation of benzene derivatives 1a-m (procedure 6):**

Dried oxygene (O<sub>2</sub> gas passed through a drying system consisting on a sulphuric acid buller followed by a cartridge of KOH and ends with a silica guard) was bubbled without flow control at room temperature for 10 min into a solution arylmagnesate in THF (10 mL) prepared by treatment of **1a-m** with a butylmagnesate base following the above general magnesation procedure 2. satd.aq.Na<sub>2</sub>S<sub>2</sub>O<sub>3</sub> (0.5 mL) and satd. aq.NH<sub>4</sub>Cl (0.5 mL) solutions were successively added and after 5 min stirring, MgSO<sub>4</sub> was added. After filtration, the

solvent was removed under vacuum to give crude alcohols **8a-d**. Procedure of purification and all analysis are reported in the next 'characterization data products' section.

**General procedure for fluorination of benzene derivatives 1a-m (procedure 7):**

To a solution of arylmagnesate in THF (10 mL) under N<sub>2</sub>, prepared by treatment of **1a-m** with a butylmagnesate base following the above general magnesation procedure 2, was added dropwise at room temperature a solution of *N*-fluorobenzenesulfonimide (NFSi) (6 mmol or 8 mmol respectively) in THF (6 mL). After 30 min stirring, satd.aq.NH<sub>4</sub>Cl (1 mL) was added. The mixture was extracted with Et<sub>2</sub>O (20 mL) and the combined organic phases were washed with aq.NaOH (20mL of 0.5 M solution), water (20mL) and brine (20 mL), dried over MgSO<sub>4</sub>. After filtration, the solvent was removed under vacuum to give crude fluoroaromatics **9a-e**. Procedure of purification and all analysis are reported in the next 'characterization data products' section.

## Characterization Data of Products

### 4-Chloro-*N*-cumylbenzamide (**1h**)

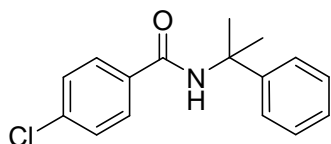

Crude **1h** was prepared according the above reported general synthesis of benzamides and purified by column chromatography on silica gel (AcOEt/PE 2:8, R<sub>f</sub> = 0.4) to give a white solid (mp = 198-199°C). <sup>1</sup>H NMR (CDCl<sub>3</sub>) δ 7.72-7.67 (m, 2H), 7.46-7.33 (m, 6H), 7.28-7.23 (m, 1H), 6.35 (br s, 1H), 1.82 (s, 6H); <sup>13</sup>C NMR (CDCl<sub>3</sub>) δ 165.5, 146.7, 137.7, 133.8, 128.9, 128.7, 128.4, 127.0, 124.8, 56.6, 29.21; IR (KBr) ν 3277, 3060, 2978, 2364, 1634, 1594, 1534, 1486, 1196, 1013, 848, 762, 695; Anal. calcd. for C<sub>16</sub>H<sub>16</sub>ClNO : C, 70.20; H, 5.89; N, 5.12. Found: C, 70.42; H, 5.91; N, 4.95.

### 2-Iodo-2'-oxazolinylbenzene (**2a**)

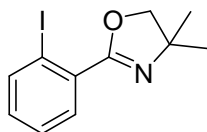

Crude **2a** was prepared according to the above procedure 3 using Bu<sub>3</sub>MgLi as base and purified by flash chromatography to give an oil (1.0g, 75%). All analyses are in accordance with those reported in literature.<sup>5a</sup>

### 4-Chloro-2-iodo-2'-oxazolinylbenzene (**2b**)

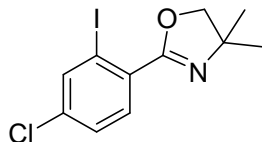

Crude **2b** was prepared according to the general procedure 3 using Bu<sub>3</sub>MgLi as base and purified by flash chromatography (1.1g, 68%). All analyses are in accordance with those reported in literature.<sup>5b</sup>

<sup>5</sup> (a) J.-J. Li, R. Giri, J.-Q. Yu, *Tetrahedron*, 2008, **64**, 6979-6987. (b) J. Takaya, K. Sangu, N. Iwasawa, *Angew. Chem. Int. Ed.*, 2009, **48**, 7090-7093. (c) U. Ladziata, A. Y. Kuposov, K. Y. Lo, J. Willging, V. N. Nemykin, V. V. Zhdankin, *Angew. Chem. Int. Ed.*, 2005, **44**, 7127-7131. (d) Y. Yamagushi, Y. Matsubara, T. Ochi, T. Wakamiya, Z. I. Yoshida, *J. Am. Chem. Soc.*, 2008, **130**, 13867-13869.

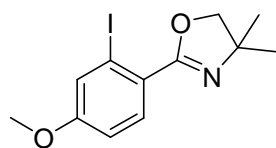

**2-Iodo-4-methoxy-2'-oxazolinylbenzene (2c)**

Crude **2c** was prepared according to the general procedure 3 using  $\text{Bu}_3\text{MgLi}$  as base and purified by flash chromatography (1.1g, 71%). All analyses are in accordance with those reported in literature.<sup>5b</sup>

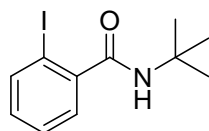

**2-Iodo-N-tert-butylbenzamide (2d)**

Crude **2d** was prepared according to the general procedure 3 using  $\text{Bu}_4\text{MgLi}_2$  as base and purified by flash chromatography (AcOEt/PE 1:9,  $R_f = 0.11$ ) as a white solid (0.9g, 82%), mp 124-125°C.  $^1\text{H}$  NMR ( $\text{CDCl}_3$ )  $\delta$  7.84-7.82 (m, 1H), 7.40-7.33 (m, 2H), 7.09-7.04 (m, 1H), 5.52 (br s, 1H) 1.49 (s, 9H);  $^{13}\text{C}$  NMR ( $\text{CDCl}_3$ )  $\delta$  168.8, 143.3, 139.7, 130.8, 128.2, 128.1, 92.5, 52.3, 28.8; IR (KBr)  $\nu$  3243, 3070, 2971, 1639, 1588, 1555, 1331, 1224, 1014, 943, 881, 749, 719, 677, 637; Anal. calcd. for  $\text{C}_{11}\text{H}_{14}\text{INO}$ : C, 43.58; H, 4.66; N, 4.62. Found: C, 43.60; H, 4.60; N, 4.65.

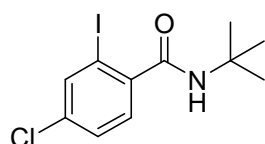

**4-Chloro-2-iodo-N-tert-butylbenzamide (2e)**

Crude **2e** was prepared according to the general procedure 3 using  $\text{Bu}_4\text{MgLi}_2$  as base and purified by flash chromatography (AcOEt/PE 2:8,  $R_f = 0.46$ ) as a white solid (0.9g, 76%), mp= 142-143 °C.  $^1\text{H}$  NMR ( $\text{CDCl}_3$ )  $\delta$  7.83 (d,  $J=1.8\text{Hz}$ , 1H), 7.36-7.29 (m, 2H), 5.52 (br s, 1H), 1.48 (s, 9H).  $^{13}\text{C}$  NMR ( $\text{CDCl}_3$ )  $\delta$  167.9, 141.6, 139.0, 135.6, 128.8, 128.4, 92.7, 52.4, 28.7; IR (KBr)  $\nu$  3255, 2964, 1637, 1553, 1365, 1224, 1095, 822, 572; Anal. calcd. for  $\text{C}_{11}\text{H}_{13}\text{ClINO}$ : C, 39.14; H, 3.88; N, 4.15. Found: C, 39.23; H, 3.67; N, 4.15.

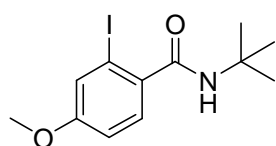

**2-Iodo-4-methoxy-N-tert-butylbenzamide (2f)**

Crude **2f** was prepared according to the general procedure 3 using  $\text{Bu}_4\text{MgLi}_2$  as base and purified by flash chromatography (AcOEt/PE 2:8,  $R_f = 0.3$ ) as a white solid (1g, 84%), mp = 82-83 °C.  $^1\text{H}$  NMR ( $\text{CDCl}_3$ )  $\delta$  7.35 (s, 1H), 7.33 (dd,  $J=8.4\text{Hz}$ ,  $J=2.7\text{Hz}$ , 1H), 6.87 (dd,  $J=8.7\text{Hz}$ ,  $J=2.4\text{Hz}$ , 1H), 5.56 (br s, 1H), 3.79 (s, 3H), 1.47 (s, 9H).  $^{13}\text{C}$  NMR ( $\text{CDCl}_3$ )  $\delta$  168.5, 160.3, 135.6, 129.2, 124.9, 114.0, 92.9, 55.6, 52.1, 28.8 IR (KBr)  $\nu$  3275, 2967, 1633, 1594, 1485, 1295, 1223, 1026, 887, 837, 820, 685; Anal. calcd. for  $\text{C}_{12}\text{H}_{16}\text{INO}_2$ : C, 43.26; H, 4.84; N, 4.20. Found: C, 43.34; H, 4.78; N, 4.23.

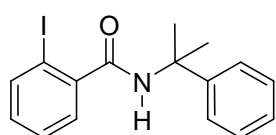

**2-Iodo-N-cumylbenzamide (2g)**

Crude **2g** was prepared according to the general procedure 3 using  $\text{Bu}_4\text{MgLi}_2$  as base and purified by flash chromatography (AcOEt/PE 2:8,  $R_f = 0.2$ ) as a orange solid (1.2g, 88%), mp= 122-123°C.  $^1\text{H}$  NMR ( $\text{CDCl}_3$ )  $\delta$  7.86-7.83

(m, 1H), 7.54-7.51 (m, 2H), 7.43-7.34 (m, 4H), 7.29-7.23 (m, 1H), 7.10-7.05 (m, 1H), 6.04 (br s, 1H), 1.85 (s, 6H);  $^{13}\text{C}$  NMR ( $\text{CDCl}_3$ )  $\delta$  168.2, 146.6, 142.8, 139.9, 131.0, 128.6, 128.4, 128.2, 127.0, 125.0, 92.4, 56.3, 28.9; IR (KBr)  $\nu$  3312, 3059, 2987, 2933, 1649, 1583, 1526, 1309, 1194, 1017, 906, 751, 694, 561; Anal. calcd. for  $\text{C}_{16}\text{H}_{16}\text{INO}$ : C, 52.62; H, 4.42; N, 3.84. Found: C, 52.62; H, 4.52; N, 3.65.

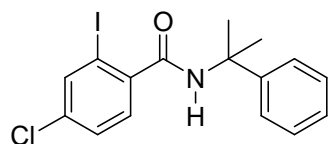

#### 4-Chloro-2-iodo-N-cumylbenzamide (2h)

Crude **2h** was prepared according to the general procedure 3 using  $\text{Bu}_4\text{MgLi}_2$  as base and purified by flash chromatography ( $\text{AcOEt/PE}$  2:8,  $R_f = 0.4$ ) as a white solid (1.2g, 82%), mp = 132-133 °C.  $^1\text{H}$  NMR ( $\text{CDCl}_3$ )  $\delta$  7.85-7.84 (m, 1H), 7.52-7.48 (m, 2H), 7.39-7.34 (m, 4H), 7.29-7.24 (m, 1H), 6.01 (br s, 1H), 1.85 (s, 6H);  $^{13}\text{C}$  NMR ( $\text{CDCl}_3$ )  $\delta$  167.3, 146.4, 141.1, 139.1, 135.7, 129.0, 128.5, 128.4, 126.9, 125.0, 92.6, 56.9, 28.8; IR (KBr)  $\nu$  3230, 3058, 2976, 1640, 1577, 1552, 1322, 1097, 1029, 767, 703; Anal. calcd. for  $\text{C}_{16}\text{H}_{15}\text{ClINO}$ : C, 48.08; H, 3.78; N, 3.50. Found: C, 48.12; H, 3.53; N, 3.73.

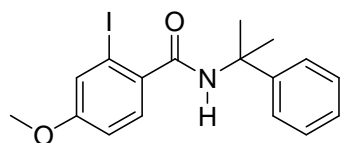

#### 2-Iodo-4-methoxy-N-cumylbenzamide (2i)

Crude **2i** was prepared according to the general procedure 3 using  $\text{Bu}_4\text{MgLi}_2$  as base and purified by flash chromatography ( $\text{AcOEt/PE}$  2:8,  $R_f = 0.2$ ) as a white solid (1.2g, 87%), mp = 121-122 °C.  $^1\text{H}$  NMR ( $\text{CDCl}_3$ )  $\delta$  7.53-7.50 (m, 2H), 7.39-7.23 (m, 5H), 6.90-6.87 (m, 1H), 6.14 (br s, 1H), 3.80 (s, 3H), 1.84 (s, 6H);  $^{13}\text{C}$  NMR ( $\text{CDCl}_3$ )  $\delta$  167.9, 160.6, 146.7, 135.1, 129.6, 128.5, 126.9, 125.2, 125.0, 114.1, 92.9, 56.8, 55.7, 29.0; IR (KBr)  $\nu$  3230, 3071, 2973, 1639, 1597, 1490, 1326, 1235, 1034, 817, 761, 701, 549; Anal. calcd. for  $\text{C}_{17}\text{H}_{18}\text{INO}_2$ : C, 51.66; H, 4.59; N, 3.54. Found: C, 51.76; H, 4.48; N, 3.33.

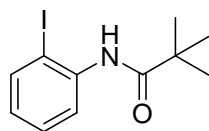

#### 2-Iodo-pivaloylaminobenzene (2k)

Crude **2f** was prepared according to the general procedure 3 using  $\text{Bu}_4\text{MgLi}_2$  as base and purified by flash chromatography ( $\text{AcOEt/PE}$  2:8,  $R_f = 0.4$ ) as yellow solid (0.4g, 70%). All analyses are in accordance with those reported in literature.<sup>5c</sup>

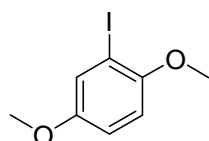

#### 1,4-Dimethoxy-2-Iodobenzene (2m)

Crude **2m** was prepared according to the general procedure 3 using  $\text{Bu}_4\text{MgLi}_2$  as base and purified by flash chromatography ( $\text{AcOEt/PE}$  2:8,  $R_f = 0.7$ ) flash chromatography (1.5g, 91%). All analyses are in accordance with those reported in literature.<sup>5d</sup>



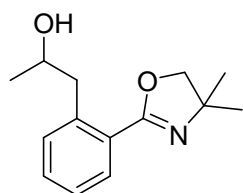

### 2-(2'-Hydroxypropyl)-2'-oxazolinylbenzene (3a)

Crude **3a** was prepared according to the general procedure 4 using  $\text{Bu}_3\text{MgLi}$  as base and purified by flash chromatography (AcOEt/PE 6:4,  $R_f = 0.4$ ) as a pale yellow oil (0.6g, 55%).  $^1\text{H}$  NMR ( $\text{CDCl}_3$ )  $\delta$  7.75-7.72 (m, 1H), 7.43-7.37 (m, 1H), 7.28-7.23 (m, 2H), 6.37 (br s, 1H), 4.12 (s, 1H), 4.11 (s, 1H), 4.1-4.04 (m, 1H), 3.16-3.02 (m, 2H), 1.41 (s, 3H), 1.40 (s, 3H), 1.30 (d,  $J=6.3\text{Hz}$ , 3H);  $^{13}\text{C}$  NMR ( $\text{CDCl}_3$ )  $\delta$  162.9, 140.0, 131.6, 130.7, 129.4, 127.3, 126.0, 78.9, 69.4, 67.8, 42.4, 28.5, 28.2, 24.4; IR (KBr)  $\nu$  3288, 2966, 2928, 2870, 1645, 1355, 1313, 1059, 744; Anal. calcd. for  $\text{C}_{14}\text{H}_{19}\text{NO}_2$ : C, 72.07; H, 8.21; N, 6.00. Found: C, 71.97; H, 8.12; N, 6.13.

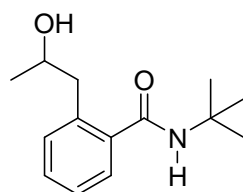

### 2-(2'-Hydroxypropyl)-N-tert-butylbenzamide (3b)

Crude **3b** was prepared according to the general procedure 4 using  $\text{Bu}_4\text{MgLi}_2$  as base and purified by flash chromatography (AcOEt/PE 3:7,  $R_f = 0.2$ ) as a white solid (0.4g, 42%), mp = 99-100°C.  $^1\text{H}$  NMR ( $\text{CDCl}_3$ )  $\delta$  7.40-7.34 (m, 2H), 7.26-7.20 (m, 2H), 6.19 (br s, 1H), 4.31 (d,  $J=4.8\text{Hz}$ , 1H), 4.08-3.97 (m, 1H), 2.90-2.77 (m, 2H), 1.46 (s, 9H), 1.31 (d,  $J=6.3\text{Hz}$ , 3H);  $^{13}\text{C}$  NMR ( $\text{CDCl}_3$ )  $\delta$  170.1, 138.0, 137.3, 130.8, 129.9, 127.3, 126.3, 69.0, 52.0, 42.1, 28.8, 24.3; IR (KBr)  $\nu$  3200, 3072, 2963, 2926, 1632, 1598, 1580, 1554, 1451, 1427, 1365, 1331, 1226, 1125, 745; Anal. calcd. for  $\text{C}_{14}\text{H}_{21}\text{NO}_2$ : C, 71.46; H, 8.99; N, 5.95. Found: C, 71.46; H, 9.03; N, 5.96.

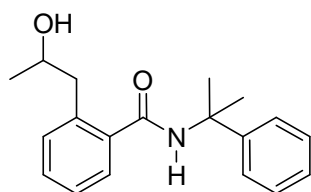

### 2-(2'-Hydroxypropyl)-N-cumylbenzamide (3c)

Crude **3c** was prepared according to the general procedure 4 using  $\text{Bu}_4\text{MgLi}_2$  as base and purified by flash chromatography (AcOEt/PE 1:1,  $R_f = 0.4$ ) as a white solid (0.7g, 61%), mp = 115-116°C.  $^1\text{H}$  NMR ( $\text{CDCl}_3$ )  $\delta$  7.49-7.46 (m, 3H), 7.42-7.33 (m, 3H), 7.28-7.24 (m, 3H), 6.69 (br s, 1H), 4.00-3.96 (m, 2H), 2.90-2.77 (m, 2H), 1.83 (s, 3H), 1.80 (s, 3H), 1.26 (d,  $J=6.0\text{Hz}$ , 3H);  $^{13}\text{C}$  NMR ( $\text{CDCl}_3$ )  $\delta$  169.6, 146.7, 137.5, 130.9, 130.1, 128.4, 127.4, 126.7, 126.4, 124.9, 69.1, 56.5, 42.1, 29.4, 29.0, 24.2; IR (KBr)  $\nu$  3345, 3059, 2965, 2927, 1610, 1413, 1309, 1194, 1017, 906, 751, 694, 561; Anal. calcd. for  $\text{C}_{19}\text{H}_{23}\text{NO}_2$ : C, 76.73; H, 7.80; N, 4.71. Found: C, 76.70; H, 7.85; N, 3.69.

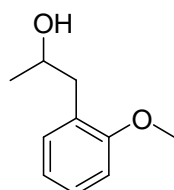

### 2-(2'-Hydroxypropyl)-anisole (3d)

Crude **3d** was prepared according to the general procedure 4 using  $\text{Bu}_4\text{MgLi}_2$  as base and purified by flash chromatography (AcOEt/PE 2:8,  $R_f = 0.3$ ) as limpid oil (0.6g, 57%). All analyses are in accordance with those reported in



literature.<sup>6</sup>

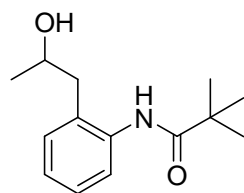

### 2-(2'-Hydroxypropyl)-pivaloylaminobenzene (3e)

Crude **3e** was prepared according to the general procedure 4 using  $\text{Bu}_4\text{MgLi}_2$  as base and purified by flash chromatography (AcOEt/PE 2:8,  $R_f = 0.2$ ) as a white solid (0.2g, 50%), mp 101°C.  $^1\text{H}$  NMR ( $\text{CDCl}_3$ ) 9.03 (br s, 1H), 7.82-7.79 (m, 1H), 7.26-7.21 (m, 1H), 7.13-7.04 (m, 2H), 4.18-4.10 (m, 1H), 2.80-2.63 (m, 2H), 2.10 (br s, 1H), 1.31 (s, 9H), 1.28 (s, 3H);  $^{13}\text{C}$  NMR ( $\text{CDCl}_3$ )  $\delta$  177.6, 137.1, 131.1, 131.0, 126.9, 124.6, 124.5, 70.0, 40.8, 39.6, 27.8, 23.9; IR (KBr)  $\nu$  3326, 2961, 2926, 2867, 1638, 1552, 1310, 1201, 1132, 1070, 799, 733, 678; Anal. calcd. for  $\text{C}_{14}\text{H}_{21}\text{NO}_2$ : C, 71.46; H, 8.99; N, 5.95. Found: C, 71.39; H, 8.99; N, 6.03.

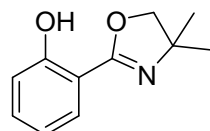

### 2-Hydroxy-2'-oxazolinybenzene (8a)

Crude **8a** was prepared according to the general procedure 6 using  $\text{Bu}_3\text{MgLi}$  as base and purified by flash chromatography (AcOEt/PE 1:9,  $R_f = 0.5$ ) as limpid oil (0.5g, 55%). All analyses are in accordance with those reported in literature.<sup>7a</sup>

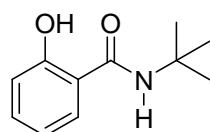

### 2-Hydroxy-N-tert-butylbenzamide (8b)

Crude **8b** was prepared according to the general procedure 6 using  $\text{Bu}_4\text{MgLi}_2$  as base and purified by flash chromatography (AcOEt/PE 1:9,  $R_f = 0.3$ ) as a white solid (0.3g, 37%), mp= 82-83°C.  $^1\text{H}$  NMR ( $\text{CDCl}_3$ )  $\delta$  12.50 (br s, 1H), 7.39-7.33 (m, 1H), 7.27 (dd,  $J=8.1\text{Hz}$ ,  $J=1.5\text{Hz}$ , 1H), 6.96 (dd,  $J=8.4\text{Hz}$ ,  $J=1.2\text{Hz}$ , 1H), 6.84-6.79 (m, 1H), 6.10 (br s, 1H), 1.48 (s, 9H);  $^{13}\text{C}$  NMR ( $\text{CDCl}_3$ )  $\delta$  169.9, 161.7, 133.9, 125.4, 118.7, 118.5, 115.2, 52.2, 28.9; IR (KBr)  $\nu$  3343, 2969, 2722, 1606, 1573, 1500, 1457, 1390, 1364, 1325, 1231, 1157, 891, 754, 648; Anal. calcd. for  $\text{C}_{11}\text{H}_{15}\text{NO}_2$ : C, 68.37; H, 7.82; N, 7.25. Found: C, 68.13; H, 7.80; N, 7.17.

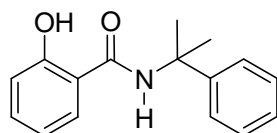

### 2-Hydroxy-N-cumylbenzamide (8c)

Crude **8c** was prepared according to the general procedure 6 using  $\text{Bu}_4\text{MgLi}_2$  as base and purified by flash chromatography (AcOEt/PE 2:8,  $R_f = 0.3$ ) as a white solid (0.2g, 23%), mp= 181-182°C.  $^1\text{H}$  NMR ( $\text{CDCl}_3$ )  $\delta$  12.21 (br s, 1H), 7.46-7.34 (m, 6H), 7.30-7.24 (m, 1H), 6.96 (dd,  $J=7.8\text{Hz}$ ,  $J=1.2\text{Hz}$ , 1H), 6.86 (ddd,  $J=8.4\text{Hz}$ ,  $J=7.5\text{Hz}$ ,  $J=12\text{Hz}$ , 1H), 6.57 (br s, 1H), 1.82 (s, 6H);  $^{13}\text{C}$  NMR ( $\text{CDCl}_3$ )  $\delta$  169.4, 161.8, 146.3, 134.2, 128.7, 127.1, 125.5, 124.6, 118.8, 118.7, 114.8, 56.7, 29.4; IR (KBr)  $\nu$

<sup>6</sup> B. Erdelyi, A. Szabo, G. Seres, L. Birincsik, J. Ivanics, G. Szatzker, L. Poppe, Tetrahedron: Asym., 2006, **17**, 268-274.

<sup>7</sup> (a) D.J. Berg, C. Zhou, T. Barclay, X. Fei, S. Feng, K. A. Ogilvie., R. A. Gossage, B. Twamley, M. Wood, Can. J. Chem., 2005, 449. (b) W.-M Dai, Y. K. Cheung, K. W. Tang, P. Y. Choi, S. L. Chung, Tetrahedron, 1995, **51**, 12263-12276.

3336, 3086, 2961, 2712, 1629, 1604, 1568, 1495, 1452, 1384, 1363, 1322, 1240, 1208, 1095, 757, 698; Anal. calcd. for C<sub>16</sub>H<sub>17</sub>NO<sub>2</sub> : C, 75.27; H, 6.71; N, 5.49. Found : C, 75.18; H, 6.69; N, 5.14.

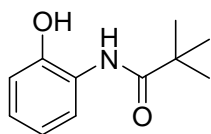

### 2-Hydroxypivaloylaminobenzene (8e)

Crude **8e** was prepared according to the general procedure 6 using Bu<sub>4</sub>MgLi<sub>2</sub> as base and purified by flash chromatography (AcOEt/PE 1:9, R<sub>f</sub> = 0.1) as a white solid (0.2g, 42%). All analyses are in accordance with those reported in literature<sup>7b</sup>

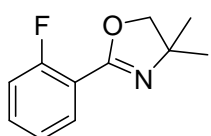

### 1-Fluoro-2-(4,4'-dimethyloxazolin-2-yl)benzene (9a)

Crude **9a** was prepared according to the general procedure 7 using Bu<sub>3</sub>MgLi as base and purified by flash chromatography (AcOEt/PE 1:9, R<sub>f</sub> = 0.1) as limpid oil (0.4g, 43%). All analyses are in accordance with those reported in literature.<sup>8a</sup>

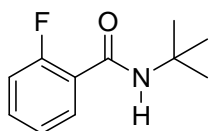

### 2-Fluoro-N-tert-butylbenzamide (9b)

Crude **9b** was prepared according to the general procedure 7 using Bu<sub>4</sub>MgLi<sub>2</sub> as base and purified by flash chromatography (AcOEt/PE 5:95, R<sub>f</sub> = 0.2) as a yellow solid (0.4g, 59%), mp= 34-35°C. <sup>1</sup>H NMR (CDCl<sub>3</sub>) δ 8.01 (ddd, *J*=9.6Hz, *J*=7.8Hz, *J*=1.8Hz, 1H), 7.43-7.36 (m, 1H), 7.20 (ddd, *J*=8.4Hz, *J*=7.8Hz, *J*=0.9Hz, 1H), 7.05 (ddd, *J*=12.3Hz, *J*=8.4Hz, *J*=0.9Hz, 1H), 6.58 (br s, 1H), 1.45 (s, 9H); <sup>13</sup>C NMR (CDCl<sub>3</sub>) δ 162.3 (*J*=3.0Hz), 160.4 (*J*=245.8Hz), 132.9 (*J*=9.0Hz), 131.8 (*J*=2.3Hz), 124.7 (*J*=3.8Hz), 122.4 (*J*=12.1Hz), 115.9 (*J*=24.9Hz), 51.8, 28.9; <sup>19</sup>F NMR (CDCl<sub>3</sub>) δ -113; IR (KBr) ν 3277, 2970, 1639, 1615, 1538, 1487, 1449, 1364, 1324, 1227, 754; Anal. calcd. for C<sub>11</sub>H<sub>14</sub>FN O : C, 67.67; H, 7.23; N, 7.17. Found : C, 67.62; H, 7.17; N, 7.06.

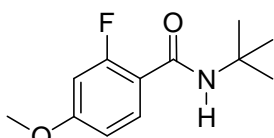

### 2-Fluoro-4-methoxy-N-tert-butylbenzamide (9c)

Crude **9c** was prepared according to the general procedure 7 using Bu<sub>4</sub>MgLi<sub>2</sub> as base and purified by flash chromatography (AcOEt/PE 2:8, R<sub>f</sub> = 0.2) as an yellow oil (0.5g, 65%). <sup>1</sup>H NMR (CDCl<sub>3</sub>) δ 8.04-7.98 (m, 1H), 6.71 (dd, *J*=8.7Hz, *J*=2.4Hz, 1H), 6.59 (dd, *J*=14.1Hz, *J*=2.4Hz, 1H), 6.50 (br s, 1H), 3.83 (s, 3H), 1.46 (s, 9H); <sup>13</sup>C NMR (CDCl<sub>3</sub>) δ 163.0 (*J*=6Hz), 162.2 (*J*=3.8Hz), 161.5 (*J*=263.9Hz), 132.9 (*J*=4.5Hz), 114.6 (*J*=12.1Hz), 110.5 (*J*=2.3Hz), 101.5 (*J*=29.4Hz), 55.8, 51.6, 28.9; <sup>19</sup>F NMR (CDCl<sub>3</sub>) δ -111; IR (KBr) ν 3466, 2967, 1665, 1621, 1535, 1500, 1455, 1281, 1268, 1221, 1155, 1104; Anal. calcd. for C<sub>12</sub>H<sub>16</sub>FN O<sub>2</sub> : C, 63.98; H, 7.16; N, 6.22. Found : C, 64.05; H, 7.13; N, 6.34.

<sup>8</sup> S. L., Sedinkin, N. P. Rath, E. B. Bauer, *J. Organomet. Chem.*, 2008, **693**, 3081-3091.

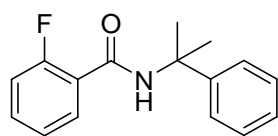

### 2-Fluoro-*N*-cumylbenzamide (**9d**)

Crude **9d** was prepared according to the general procedure 7 using  $\text{Bu}_4\text{MgLi}_2$  as base and purified by flash chromatography (AcOEt/PE 1:9,  $R_f = 0.2$ ) as a pale yellow solid (0.6g, 69%), mp = 49-50°C.  $^1\text{H}$  NMR ( $\text{CDCl}_3$ )  $\delta$  8.02 (ddd,  $J=9.6\text{Hz}$ ,  $J=7.8\text{Hz}$ ,  $J=1.8\text{Hz}$ , 1H), 7.50-7.42 (m, 3H), 7.38-7.32 (m, 2H), 7.27-7.21 (m, 2H), 7.13 (ddd,  $J=11.4\text{Hz}$ ,  $J=8.4\text{Hz}$ ,  $J=0.9\text{Hz}$ , 1H), 7.09 (br s, 1H), 1.82 (s, 6H);  $^{13}\text{C}$  NMR ( $\text{CDCl}_3$ )  $\delta$  161.9 ( $J=3.8\text{Hz}$ ), 160.4 ( $J=245.8\text{Hz}$ ), 146.7, 133.1 ( $J=9.0\text{Hz}$ ), 131.9 ( $J=2.3\text{Hz}$ ), 128.4, 126.6, 124.7 ( $J=3.8\text{Hz}$ ), 124.7, 121.9 ( $J=12.1\text{Hz}$ ), 115.9 ( $J=24.9\text{Hz}$ ), 56.3, 29.3;  $^{19}\text{F}$  NMR ( $\text{CDCl}_3$ )  $\delta$  -116; IR (KBr)  $\nu$  3462, 3311, 3061, 2976, 1667, 1651, 1614, 1520, 1480, 1450, 1302, 757, 698; Anal. calcd. for  $\text{C}_{16}\text{H}_{16}\text{FNO}$ : C, 74.69; H, 6.27; N, 5.44. Found: C, 70.64; H, 6.25; N, 4.51.

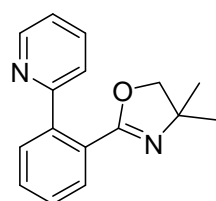

### 1-(4,4'-dimethyloxazolin-2-yl)-2-(pyridin-2-yl)benzene (**4a**)

Crude **4a** was prepared according to the general procedure 5 using  $\text{Bu}_3\text{MgLi}$  as base and purified by flash chromatography (AcOEt/PE 7:3,  $R_f = 0.2$ ) as a red oil (0.5g, 40%).  $^1\text{H}$  NMR ( $\text{CDCl}_3$ )  $\delta$  8.65 (d,  $J=4.8\text{Hz}$ , 1H), 7.78 (dd,  $J=7.8\text{Hz}$ ,  $J=1.5\text{Hz}$ , 1H), 7.71 (ddd,  $J=9.6\text{Hz}$ ,  $J=7.8\text{Hz}$ ,  $J=1.8\text{Hz}$ , 1H), 7.59 (dd,  $J=7.8\text{Hz}$ ,  $J=1.5\text{Hz}$ , 1H), 7.52 (ddd,  $J=8.7\text{Hz}$ ,  $J=7.2\text{Hz}$ ,  $J=1.2\text{Hz}$ , 1H), 7.48-7.40 (m, 2H), 7.26-7.23 (m, 1H), 3.83 (s, 2H), 1.30 (s, 6H);  $^{13}\text{C}$  NMR ( $\text{CDCl}_3$ )  $\delta$  163.1, 158.2, 148.6, 140.1, 135.6, 130.1, 129.8, 129.4, 127.8, 127.6, 122.7, 121.6, 79.0, 67.1, 27.6; IR (KBr)  $\nu$  2966, 1656, 1587, 1463, 1426, 1312, 1037, 750; Anal. calcd. for  $\text{C}_{16}\text{H}_{16}\text{N}_2\text{O}$ : C, 76.16; H, 6.39; N, 11.1. Found: C, 75.97; H, 6.35; N, 11.00.

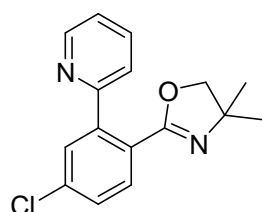

### 1-Chloro-4-(4,4'-dimethyloxazolin-2-yl)-5-(pyridine-2-yl)benzene (**4b**)

Crude **4b** was prepared according to the general procedure 5 using  $\text{Bu}_3\text{MgLi}$  as base and purified by flash chromatography (AcOEt/PE 1:1,  $R_f = 0.2$ ) as a yellow solid (0.7g, 53%), mp = 94-95°C.  $^1\text{H}$  NMR ( $\text{CDCl}_3$ )  $\delta$  8.67-8.64 (m, 1H), 7.76-7.70 (m, 2H), 7.59 (d,  $J=2.1\text{Hz}$ , 1H), 7.46-7.39 (m, 2H), 7.29-7.24 (m, 1H), 3.83 (s, 2H), 1.30 (s, 6H);  $^{13}\text{C}$  NMR ( $\text{CDCl}_3$ )  $\delta$  157.2, 149.1, 142.1, 136.3, 135.9, 131.5, 129.9, 128.1, 126.5, 126.4, 123.0, 122.3, 79.4, 67.6, 27.9; IR (KBr)  $\nu$  2978, 2965, 2925, 1651, 1588, 1466, 1427, 1398, 1348, 1311, 1102, 1072, 1034, 842, 793, 756; Anal. calcd. for  $\text{C}_{16}\text{H}_{15}\text{ClN}_2\text{O}$ : C, 67.02; H, 5.29; N, 9.77. Found: C, 67.05; H, 5.27; N, 9.83.

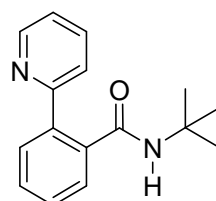

### 2-(pyridin-2-yl)-*N*-tert-butylbenzamide (**4c**)

Crude **4c** was prepared according to the general procedure 5 using  $\text{Bu}_4\text{MgLi}_2$  as base and purified by flash chromatography (AcOEt/PE 4:6,  $R_f = 0.2$ ) as a white solid (0.3g, 36%), mp = 94-95°C.  $^1\text{H}$  NMR ( $\text{CDCl}_3$ )  $\delta$  8.67-8.65 (m, 1H), 7.77-7.71 (m, 1H), 7.64-7.61 (m, 1H), 7.53-7.40 (m,

4H), 7.29 (dd,  $J=5.1\text{Hz}$ ,  $J=1.2\text{Hz}$ , 1H), 5.67 (br s, 1H), 1.21 (s, 9H);  $^{13}\text{C}$  NMR ( $\text{CDCl}_3$ )  $\delta$  169.0, 158.7, 149.2, 138.5, 137.6, 136.6, 129.8, 129.7, 128.7, 128.4, 124.3, 122.5, 51.65, 28.5; IR (KBr) 3306, 3047, 2962, 2924, 1638, 1590, 1546, 755; Anal. calcd. for  $\text{C}_{16}\text{H}_{18}\text{N}_2\text{O}$ : C, 75.56; H, 7.13; N, 11.01. Found: C, 75.56; H, 7.10; N, 11.06.

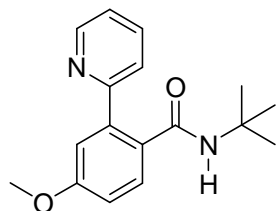

#### 4-Methoxy-2-(pyridin-2-yl)-*N*-tert-butylbenzamide (4d)

Crude **4d** was prepared according to the general procedure 5 using  $\text{Bu}_4\text{MgLi}_2$  as base and purified by flash chromatography (AcOEt/PE 1:1,  $R_f = 0.2$ ) as a yellow solid (0.4g, 41%), mp = 99-100°C.  $^1\text{H}$  NMR ( $\text{CDCl}_3$ )  $\delta$  8.66 (m, 1H), 7.74 (ddd,  $J=7.5\text{Hz}$ ,  $J=7.5\text{Hz}$ ,  $J=1.5\text{Hz}$ , 1H), 7.61 (d,  $J=8.4\text{Hz}$ , 1H), 7.47 (d,  $J=7.8\text{Hz}$ , 1H), 7.30 (ddd,  $J=7.5\text{Hz}$ ,  $J=4.8\text{Hz}$ ,  $J=0.9\text{Hz}$ , 1H), 6.99 (d,  $J=2.7\text{Hz}$ , 1H), 6.96 (dd,  $J=8.4\text{Hz}$ ,  $J=2.7\text{Hz}$ , 1H), 5.61 (br s, 1H), 3.85 (s, 3H), 1.17 (s, 9H);  $^{13}\text{C}$  NMR ( $\text{CDCl}_3$ )  $\delta$  168.3, 160.2, 158.5, 149.0, 140.0, 136.4, 130.2, 129.9, 124.1, 122.4, 114.6, 114.1, 55.3, 51.2, 28.2; IR (KBr) 3315, 1642, 1542, 1479, 1319, 1293, 1216, 1180, 1034; Anal. calcd. for  $\text{C}_{17}\text{H}_{20}\text{N}_2\text{O}_2$ : C, 71.81; H, 7.09; N, 9.85. Found: C, 71.55; H, 6.91; N, 9.69.

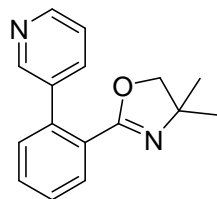

#### 1-(4,4'-dimethyloxazolin-2-yl)-2-(pyridin-3-yl)benzene (5a)

Crude **5a** was prepared according to the general procedure 5 using  $\text{Bu}_3\text{MgLi}$  as base and purified by flash chromatography (AcOEt/PE 6:4,  $R_f = 0.2$ ) as a yellow solid (0.6g, 52%), mp = 96-97°C.  $^1\text{H}$  NMR ( $\text{CDCl}_3$ )  $\delta$  8.60 (d,  $J=1.8\text{Hz}$ , 1H), 8.56 (dd,  $J=4.8\text{Hz}$ ,  $J=1.5\text{Hz}$ , 1H), 7.80 (dd,  $J=7.5\text{Hz}$ ,  $J=1.2\text{Hz}$ , 1H), 7.68 (ddd,  $J=7.8\text{Hz}$ ,  $J=5.7\text{Hz}$ ,  $J=1.8\text{Hz}$ , 1H), 7.51 (ddd,  $J=9\text{Hz}$ ,  $J=7.5\text{Hz}$ ,  $J=1.5\text{Hz}$ , 1H), 7.41 (ddd,  $J=9\text{Hz}$ ,  $J=7.5\text{Hz}$ ,  $J=1.5\text{Hz}$ , 1H), 7.36-7.28 (m, 2H), 3.82 (s, 2H), 1.26 (s, 6H);  $^{13}\text{C}$  NMR ( $\text{CDCl}_3$ )  $\delta$  163.1, 149.3, 148.4, 138.2, 137.0, 135.7, 130.8, 130.5, 130.4, 128.1, 128.0, 122.9, 79.4, 67.8, 28.1; IR (KBr)  $\nu$  2961, 2926, 2885, 1651, 1591, 1473, 1437, 1413, 1348, 1300, 1068, 1039, 1028, 968, 816, 776, 698; Anal. calcd. for  $\text{C}_{16}\text{H}_{16}\text{N}_2\text{O}$ : C, 76.16; H, 6.39; N, 11.1. Found: C, 76.10; H, 6.50; N, 11.87.

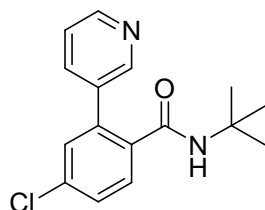

#### 4-chloro-2-(pyridin-3-yl)-*N*-tert-butylbenzamide (5b)

Crude **5b** was prepared according to the general procedure 5 using  $\text{Bu}_4\text{MgLi}_2$  as base and purified by flash chromatography (AcOEt/PE 1:1,  $R_f = 0.3$ ) as a yellow solid (0.5g, 52% $\mu$ ), mp = 172-173°C.  $^1\text{H}$  NMR ( $\text{CDCl}_3$ )  $\delta$  8.67-8.65 (m, 2H), 7.78-7.75 (m, 1H), 7.59 (d, 8.4Hz, 1H), 7.42 (dd,  $J=8.1\text{Hz}$ ,  $J=2.1\text{Hz}$ , 1H), 7.37-7.35 (m, 2H), 5.08 (br s, 1H), 1.18 (s, 9H);  $^{13}\text{C}$  NMR ( $\text{CDCl}_3$ )  $\delta$  167.3, 149.3, 149.1, 137.5, 136.2, 135.9, 135.8, 134.9, 130.0 (2C), 128.4, 123.3, 52.0, 28.4. IR (KBr) 3220, 3055, 1633, 1590, 1563, 1474, 1455, 1411, 1362, 1324,

1219, 1097, 1014, 848, 708 ; Anal. calcd. for  $C_{16}H_{17}ClN_2O$  : C, 66.55 ; H, 5.93 ; N, 9.7. Found : C, 66.13 ; H, 6.01 ; N, 9.65 .

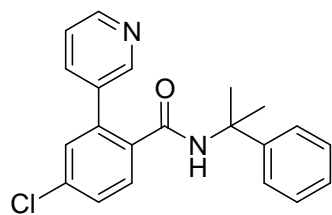

#### 4-Chloro-2-(pyridin-3-yl)-N-cumylbenzamide (5c)

Crude **5c** was prepared according to the general procedure 5 using  $Bu_4MgLi_2$  as base and purified by flash chromatography (AcOEt/Pe 3:7,  $R_f$  = 0.1) as an yellow solid (0.7g, 58%), mp= 181-182°C.  $^1H$  NMR ( $CDCl_3$ )  $\delta$  8.70 (m, 1H), 7.77 (d,  $J$ =7.8Hz, 1H), 7.61 (d,  $J$ =8.1Hz, 1H), 7.42 (ddd,  $J$ =10.5Hz,  $J$ =8.4Hz,  $J$ =2.1Hz, 1H), 7.36-7.35 (m, 2H), 7.29-7.20 (m, 4H), 7.11-7.08 (m, 2H), 5.54 (br s, 1H), 1.56 (s, 6H);  $^{13}C$  NMR ( $CDCl_3$ )  $\delta$  167.0, 149.3, 149.2, 146.3, 137.6, 136.4, 136.0, 135.6, 130.1, 130.0, 128.5, 128.4, 126.9, 124.6, 56.7, 28.2; IR (KBr) 3285, 1643, 1542, 1314, 764, 701, 558; Anal. calcd. for  $C_{21}H_{19}ClN_2O$  : C, 71.89; H, 5.46 ; N, 7.98. Found : C, 72.00; H, 5.43; N, 7.96.

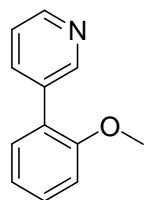

#### 2-(3'-pyridyl)-anisole (5d)

Crude **5b** was prepared according to the general procedure 5 using  $Bu_4MgLi_2$  as base and purified by flash chromatography (AcOEt/PE 2:8,  $R_f$  = 0.2) as a limpid oil (0.6g, 51%). All analyses are in accordance with those reported in literature.  
<sup>9a</sup>

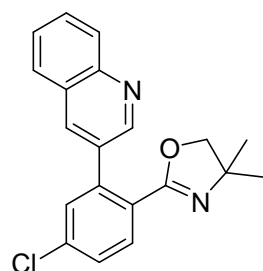

#### 4-Chloro-1-(4,4'-dimethyloxazolin-2-yl)-2-(quinolin-3-yl)benzene (6a)

Crude **6a** was prepared according to the general procedure 5 using  $Bu_3MgLi$  as base and purified by flash chromatography (AcOEt/PE 1:1,  $R_f$  = 0.4) as a white solid (1g, 62%), mp = 92-93°C.  $^1H$  NMR ( $CDCl_3$ )  $\delta$  8.86 (d,  $J$ =2.1Hz, 1H), 8.14-8.11 (m, 2H), 7.85-7.81 (m, 2H), 7.76-7.70 (m, 1H), 7.59-7.54 (m, 1H), 7.46-7.41 (m, 2H), 3.79 (s, 2H), 1.24 (s, 6H);  $^{13}C$  NMR ( $CDCl_3$ )  $\delta$  162.1, 150.6, 147.3, 140.0, 136.9, 134.5, 133.2, 132.0, 130.9, 129.8, 129.4, 128.2, 128.1, 127.7, 127.1, 126.6, 79.5, 67.9, 28.1; IR (KBr) 2964, 1667, 1305, 1099, 1037, 898, 745; Anal. calcd. for  $C_{20}H_{17}ClN_2O$  : C, 71.32; H, 5.09; N, 8.32. Found : C, 70.97; H, 5.11; N, 8.33.

<sup>9</sup> (a) A.-S. Rebstock, F. Mongin,; F. Trecourt, G. Queguiner, Org. Biomol. Chem., 2003, **1**, 3064-3068. (b) S.R. Wilson, D.T. Mao, H. N. Khatri, Synthetic Commun., 1980, **10**, 17-23. (c) H. Zhi, A. K. Yudin, Org. Lett., 2006, **8**, 5829-5832. (d) A. Fryszkowska, K. Fisher, J.M. Gardiner, J.M. Stephens, J. Org. Chem. 2008, **73**, 3295-4298

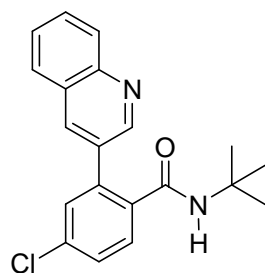

#### 4-Chloro-2-(quinolin-3-yl)-*N*-*tert*-butylbenzamide (6b)

Crude **6b** was prepared according to the general procedure 5 using  $\text{Bu}_4\text{MgLi}_2$  as base and purified by flash chromatography (AcOEt/PE 3:7,  $R_f = 0.2$ ) as a yellow solid (0.5g, 42%), mp = 171-172°C.  $^1\text{H}$  NMR ( $\text{CDCl}_3$ )  $\delta$  8.95 (d,  $J=2.4\text{Hz}$ , 1H), 8.24 (d,  $J=2.1\text{Hz}$ , 1H), 8.16 (d,  $J=8.4\text{Hz}$ , 1H), 7.85 (d,  $J=8.4\text{Hz}$ , 1H), 7.80-7.75 (m, 1H), 7.65-7.58 (m, 2H), 7.47-7.43 (m, 2H), 5.18 (br s, 1H), 1.12 (s, 9H);  $^{13}\text{C}$  NMR ( $\text{CDCl}_3$ )  $\delta$  167.5, 150.0, 147.3, 137.5, 136.0, 135.9, 135.3, 131.9, 130.2, 130.1, 130.0, 129.2, 128.3, 128.0, 127.4, 127.4, 51.9, 28.3; IR (KBr) 3246, 2967, 1664, 1593, 1547, 1455, 1310, 1227, 759; Anal. calcd. for  $\text{C}_{20}\text{H}_{19}\text{ClN}_2\text{O}$ : C, 70.90; H, 5.65; N, 8.27. Found: C, 70.89; H, 5.67; N, 8.25.

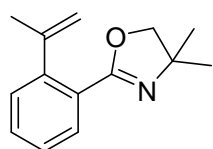

#### 1-(4,4'-dimethyloxazolin-2-yl)-2-propenyl-benzene (7a)

Crude **7a** was prepared according to the general procedure 5 using  $\text{Bu}_4\text{MgLi}_2$  as base and was purified by flash chromatography to give a mixture of **7a** and the starting material (3:2, 66%). All analyses are in accordance with those reported in literature.<sup>9b</sup>

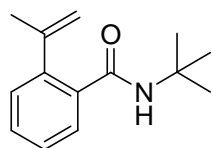

#### 2-Propenyl-*N*-*tert*-butylbenzamide (7b)

Crude **7b** was prepared according to the general procedure 5 using  $\text{Bu}_4\text{MgLi}_2$  as base and purified by flash chromatography (AcOEt/PE 3:7,  $R_f = 0.18$ ) as a white solid (0.5g, 67%), mp = 77-78°C. All analyses are in accordance with those reported in literature.<sup>9c</sup>

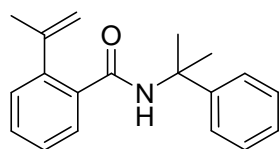

#### 2-Propenyl-*N*-cumylbenzamide (7c)

Crude **7c** was prepared according to the general procedure 5 using  $\text{Bu}_4\text{MgLi}_2$  as base and purified by flash chromatography (AcOEt/PE 2:8,  $R_f = 0.4$ ) as a white solid (0.7, 67%), mp = 100-101°C.  $^1\text{H}$  NMR ( $\text{CDCl}_3$ )  $\delta$  7.67-7.64 (m, 1H), 7.46-7.43 (m, 2H), 7.40-7.28 (m, 4H), 7.25-7.18 (m, 3H), 6.48 (br s, 1H), 5.23 (s, 1H), 5.09 (s, 1H), 2.12 (s, 3H), 1.80 (s, 6H);  $^{13}\text{C}$  NMR ( $\text{CDCl}_3$ )  $\delta$  167.9, 146.7, 146.5, 141.7, 134.8, 130.1, 128.8, 128.6, 128.4, 127.5, 126.8, 124.9, 115.9, 56.4, 28.5, 24.8; IR (KBr) 3275, 2972, 1644, 1532, 1316, 890, 765, 699; Anal. calcd. for  $\text{C}_{19}\text{H}_{21}\text{NO}$ : C, 81.68; H, 7.58; N, 5.01. Found: C, 81.70; H, 7.54; N, 5.03.

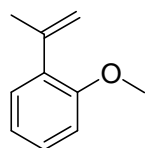

#### 2-Propenyl-anisole **7d**

Crude **7d** was prepared according to the general procedure 5 using  $\text{Bu}_4\text{MgLi}_2$  as base and purified by flash chromatography (AcOEt/PE 3:7,  $R_f = 0.18$ ) as a limpid oil (0.6g, 66%). All analyses are in accordance with those reported in literature.<sup>9d</sup>

## <sup>1</sup>H, <sup>13</sup>C and <sup>19</sup>F NMR Spectra of Product

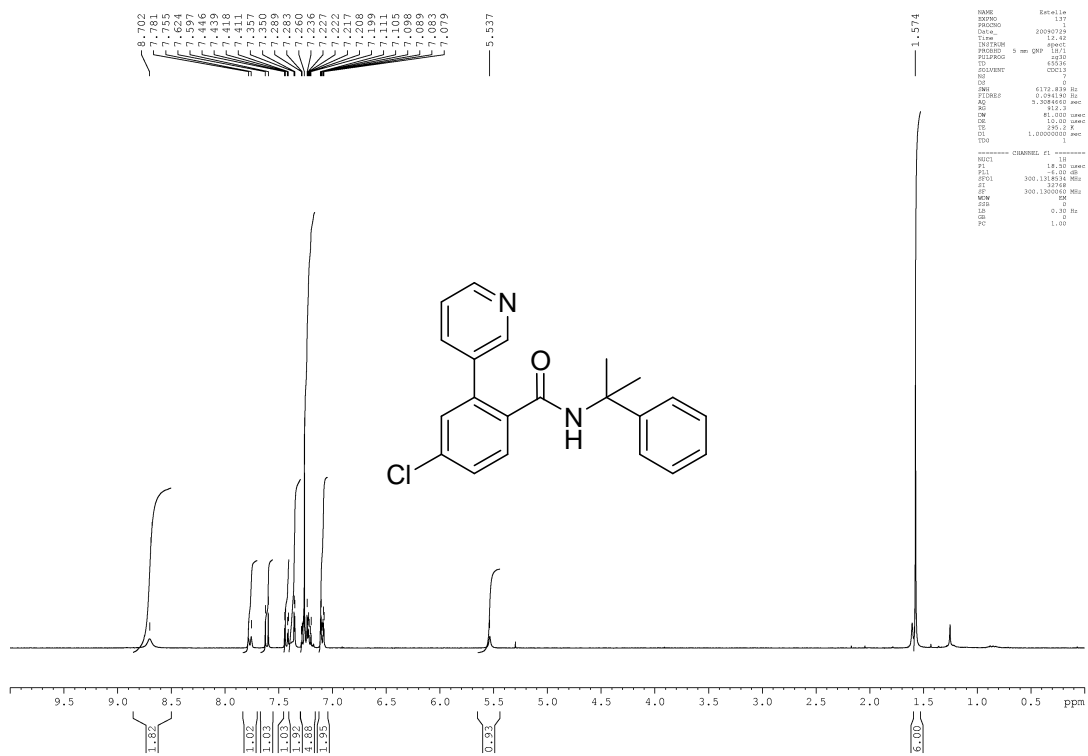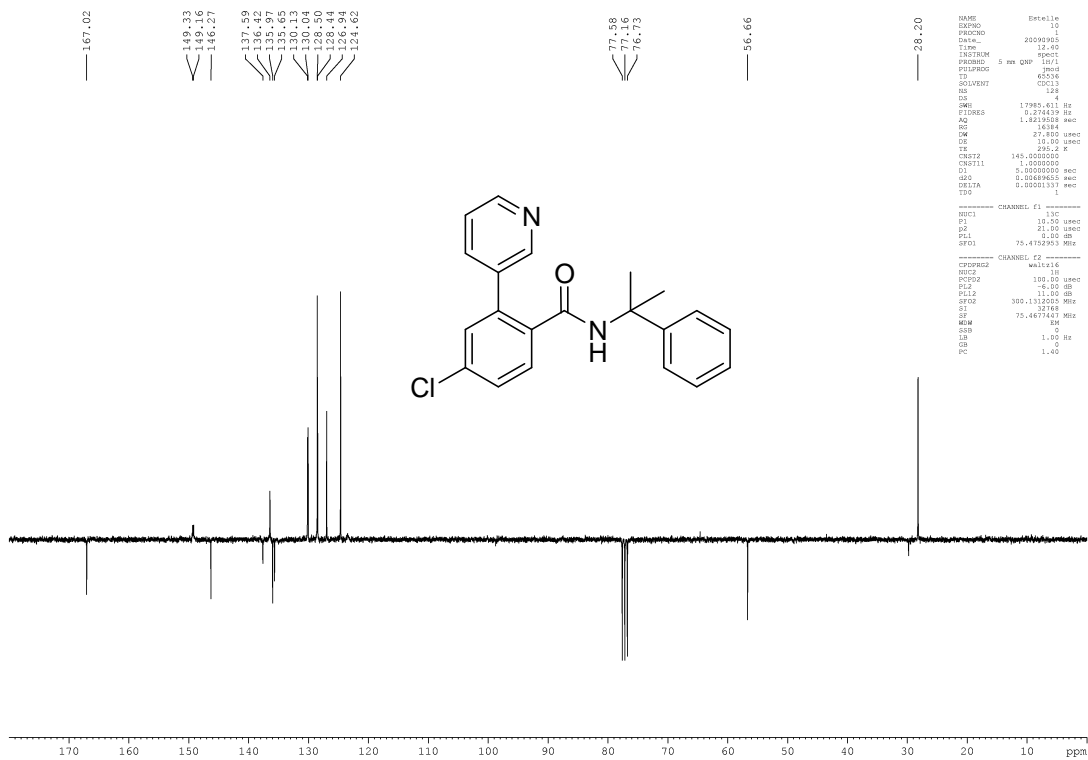



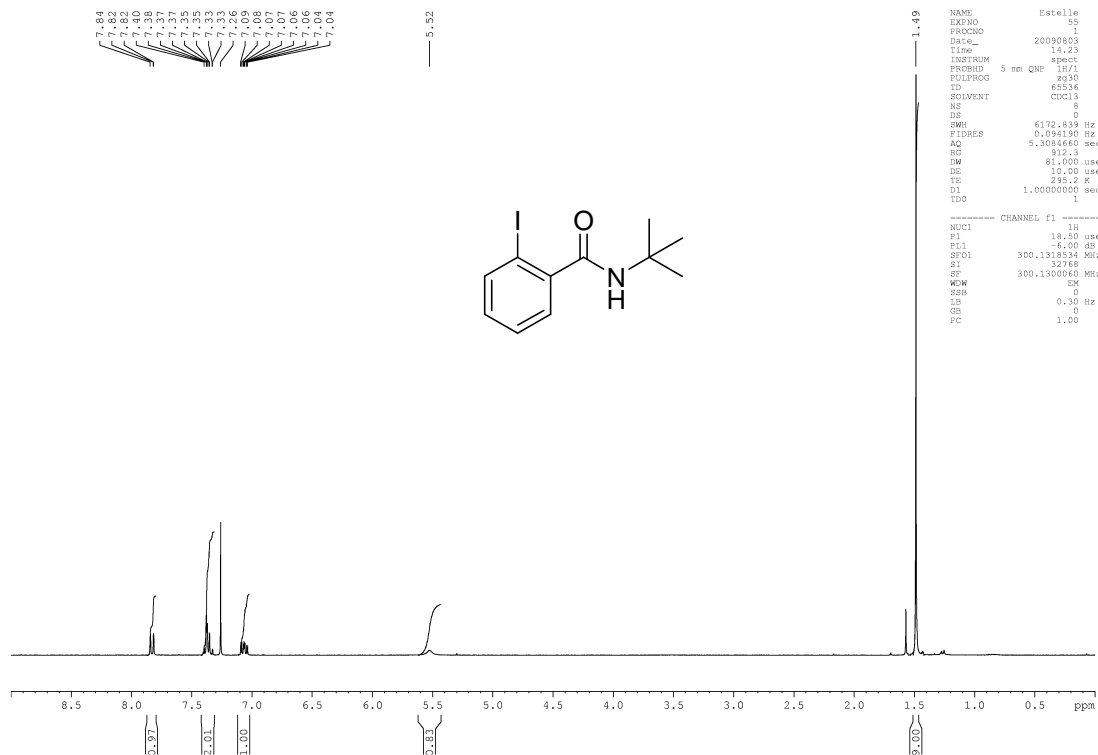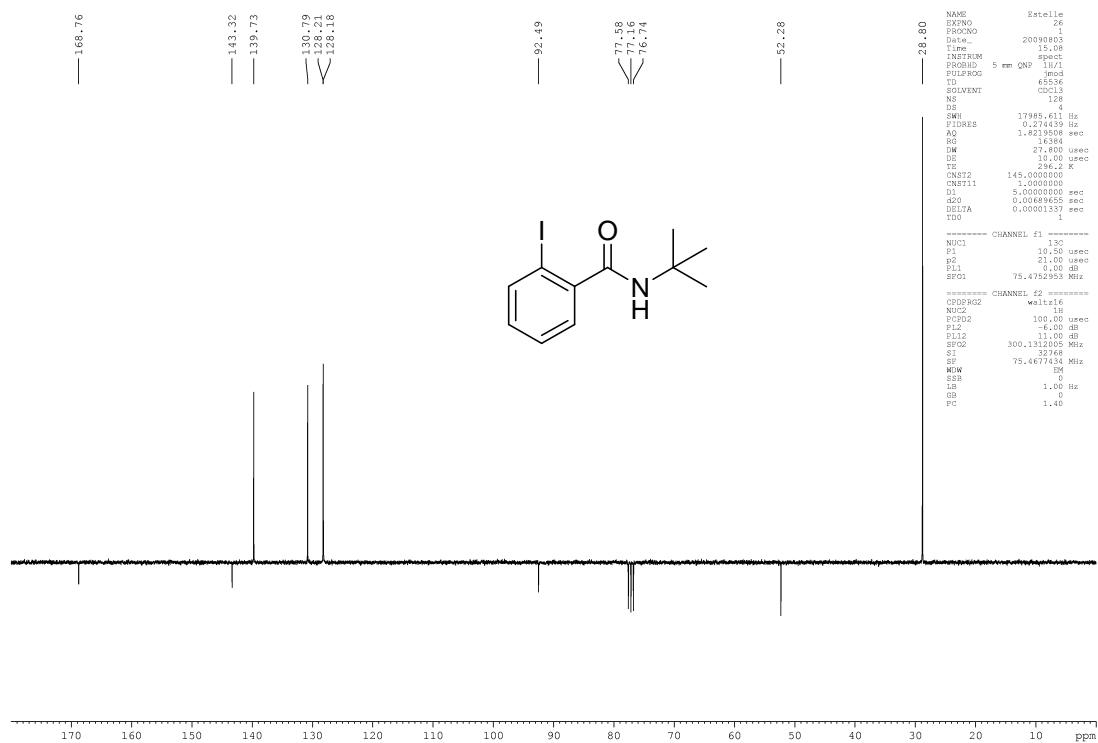

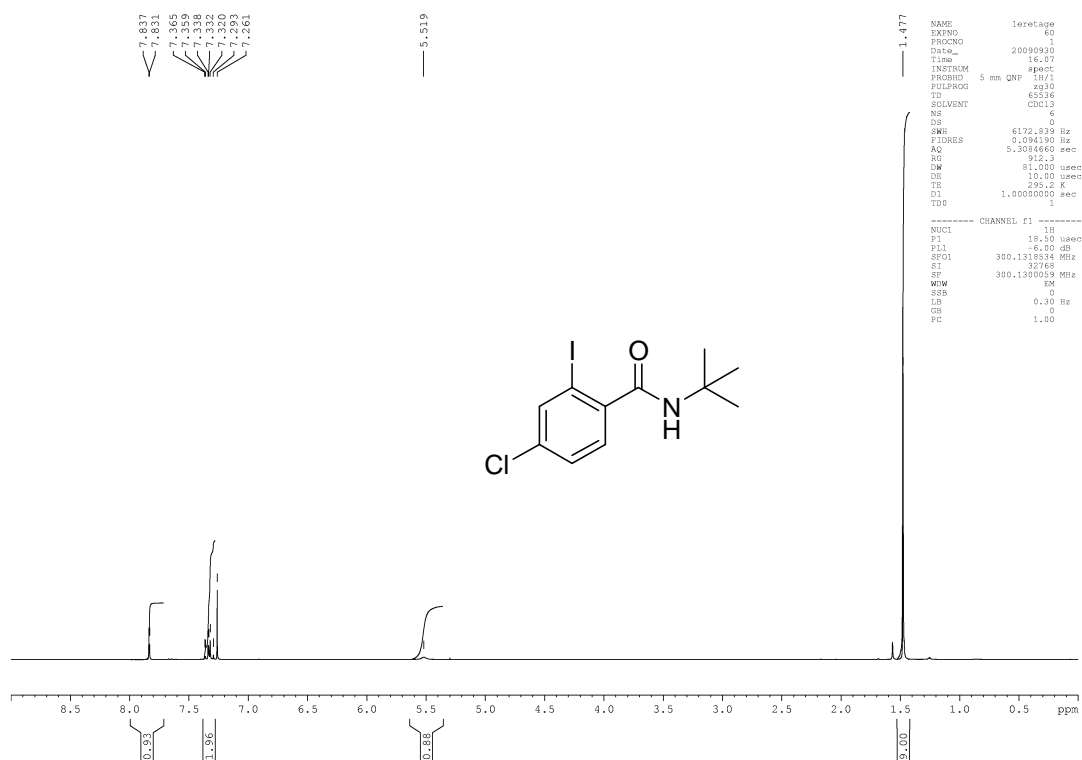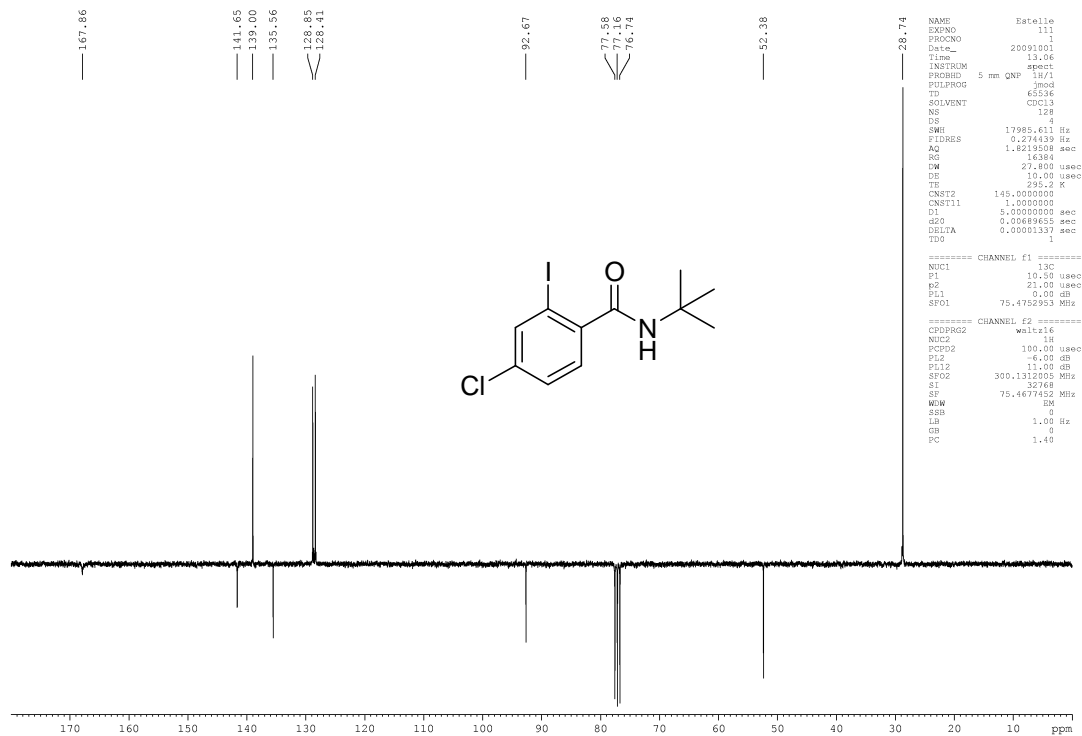

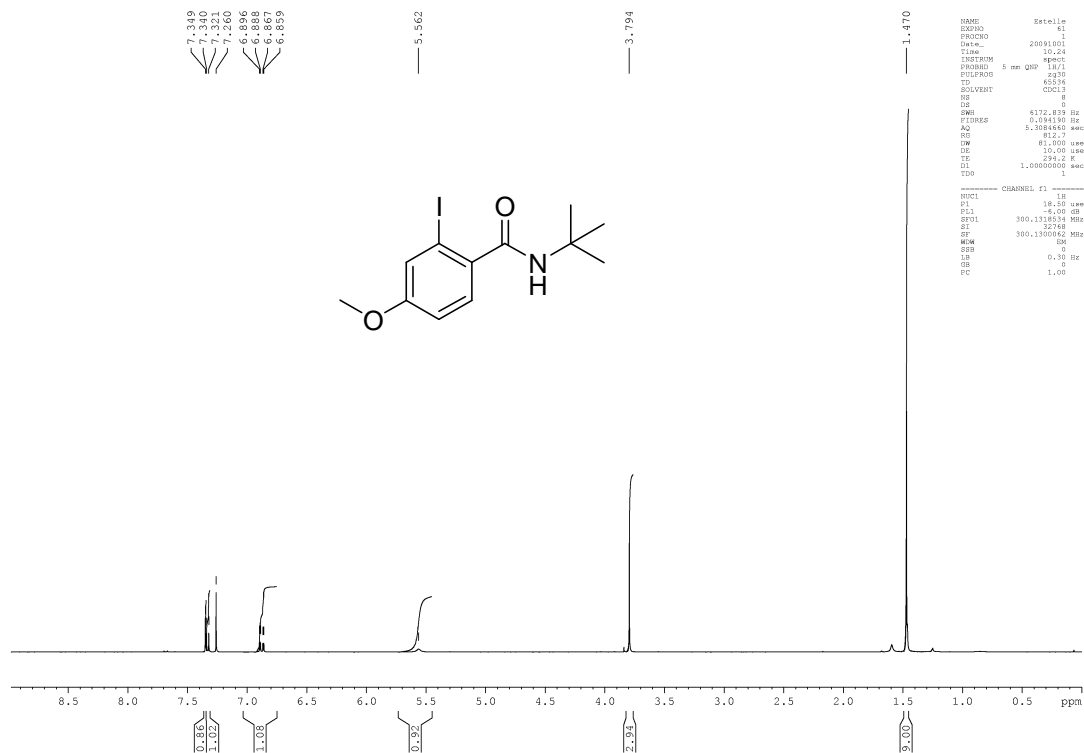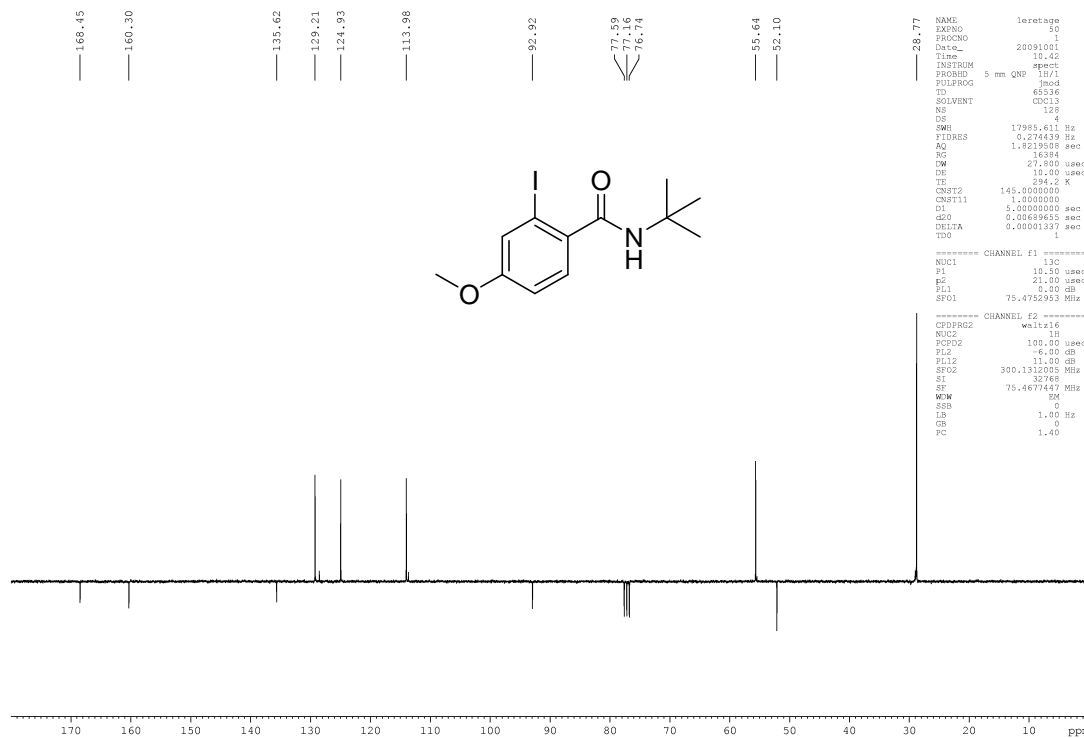

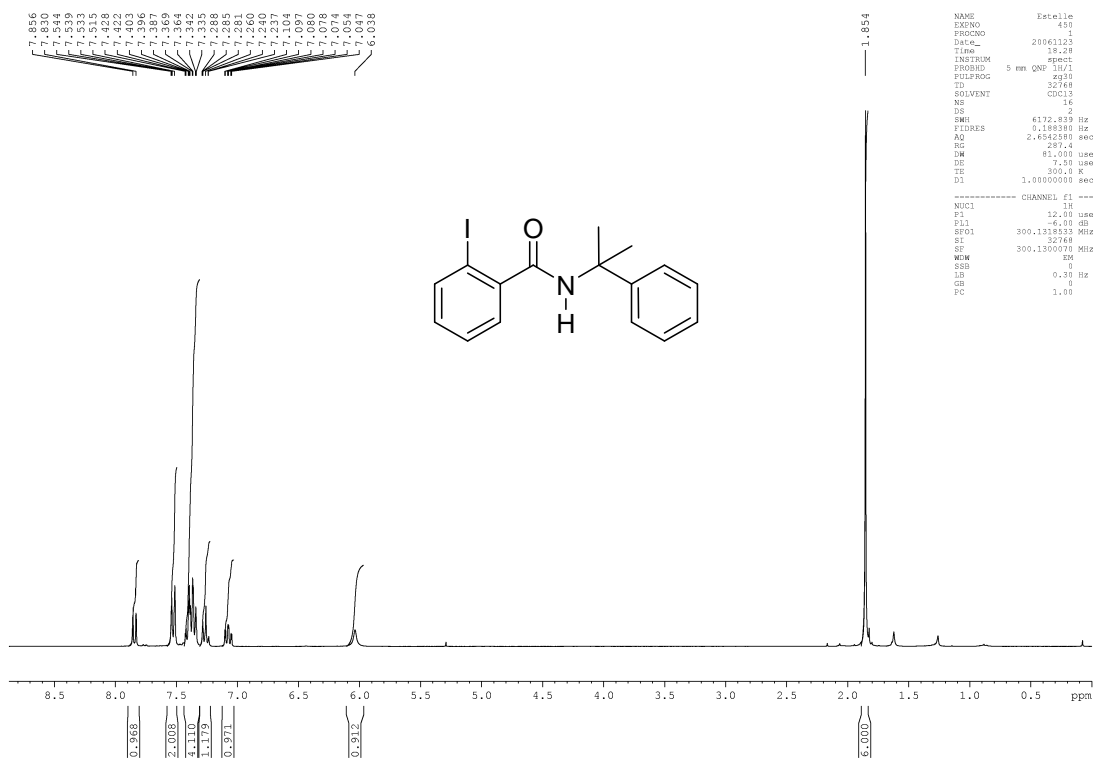

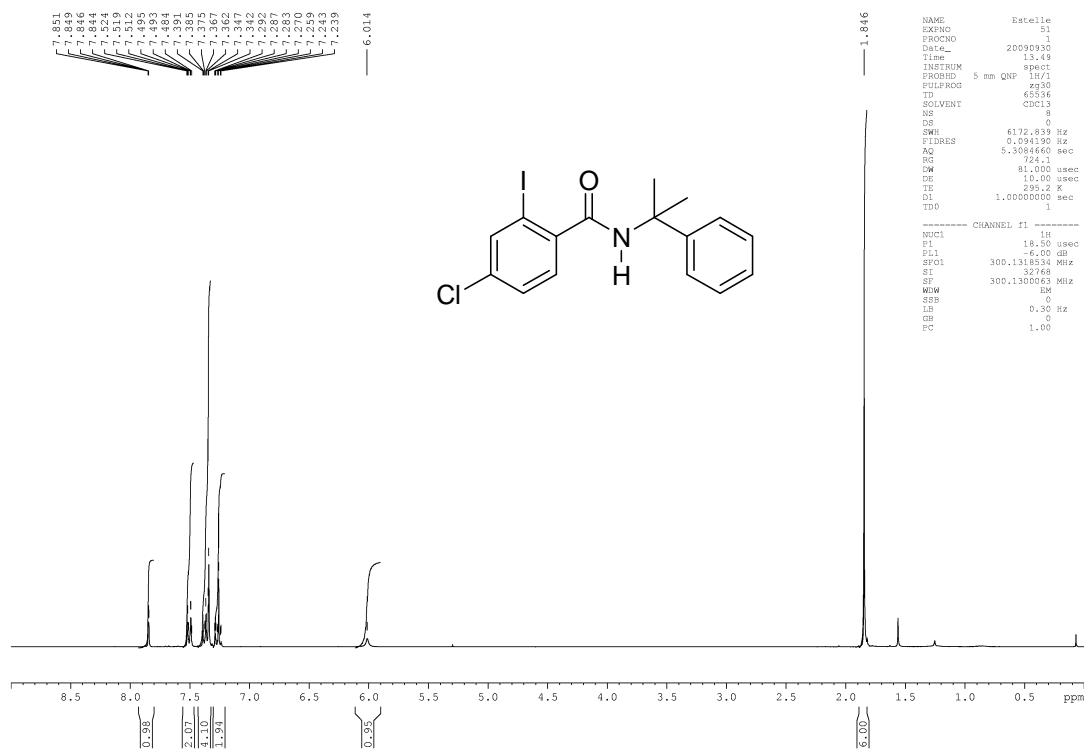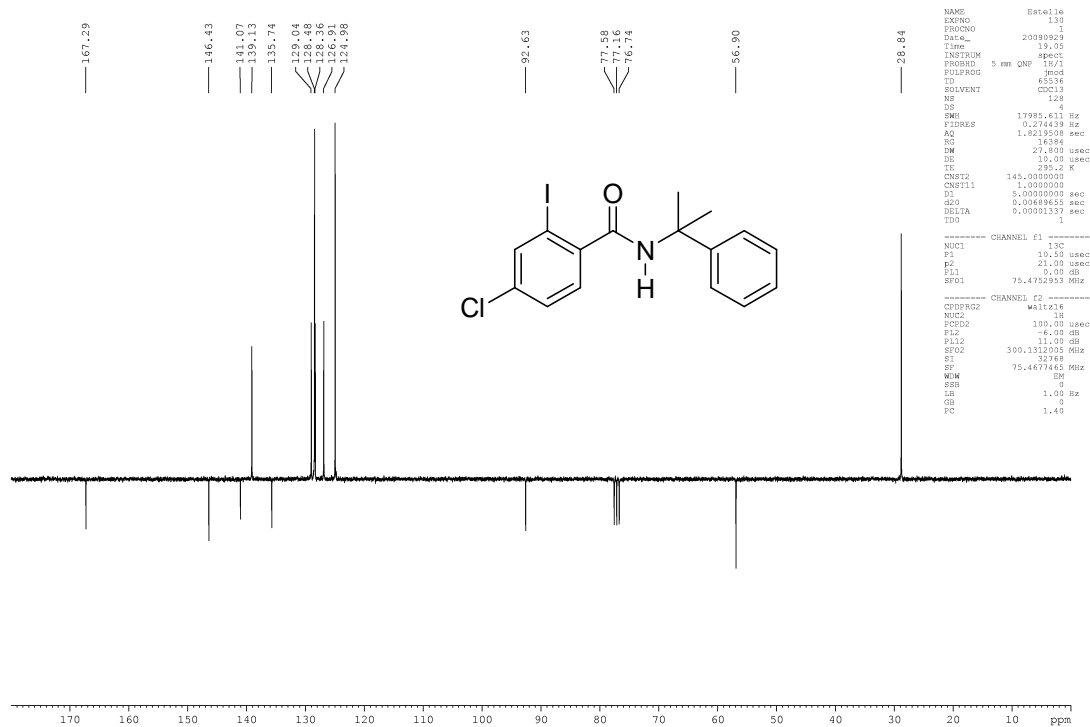

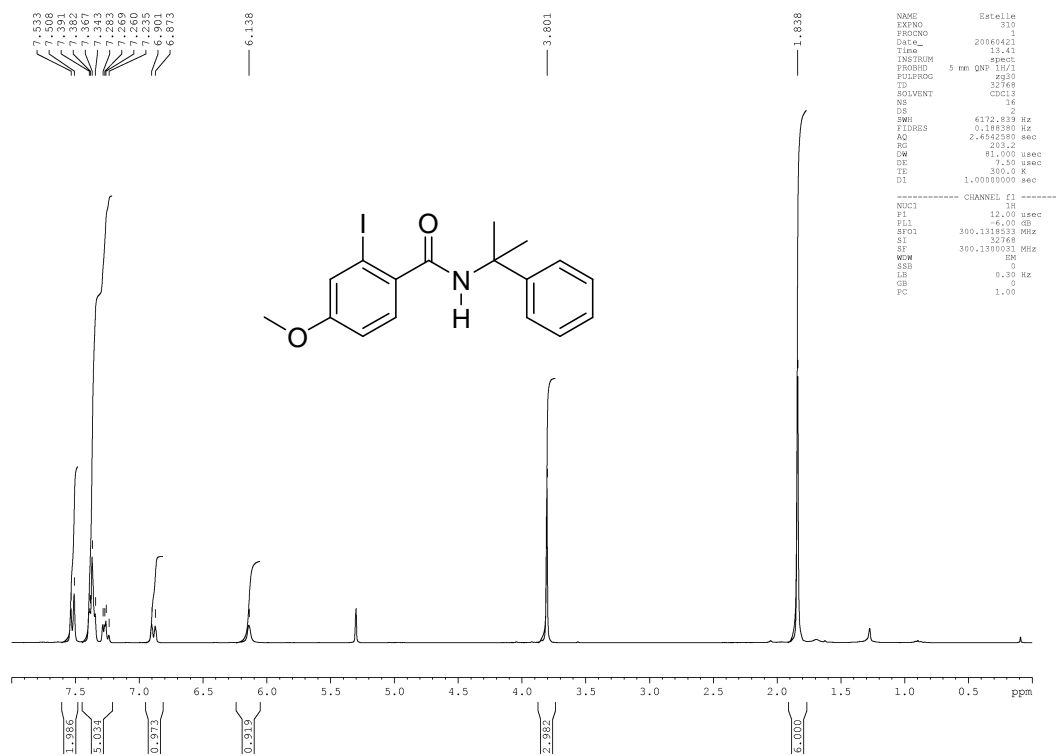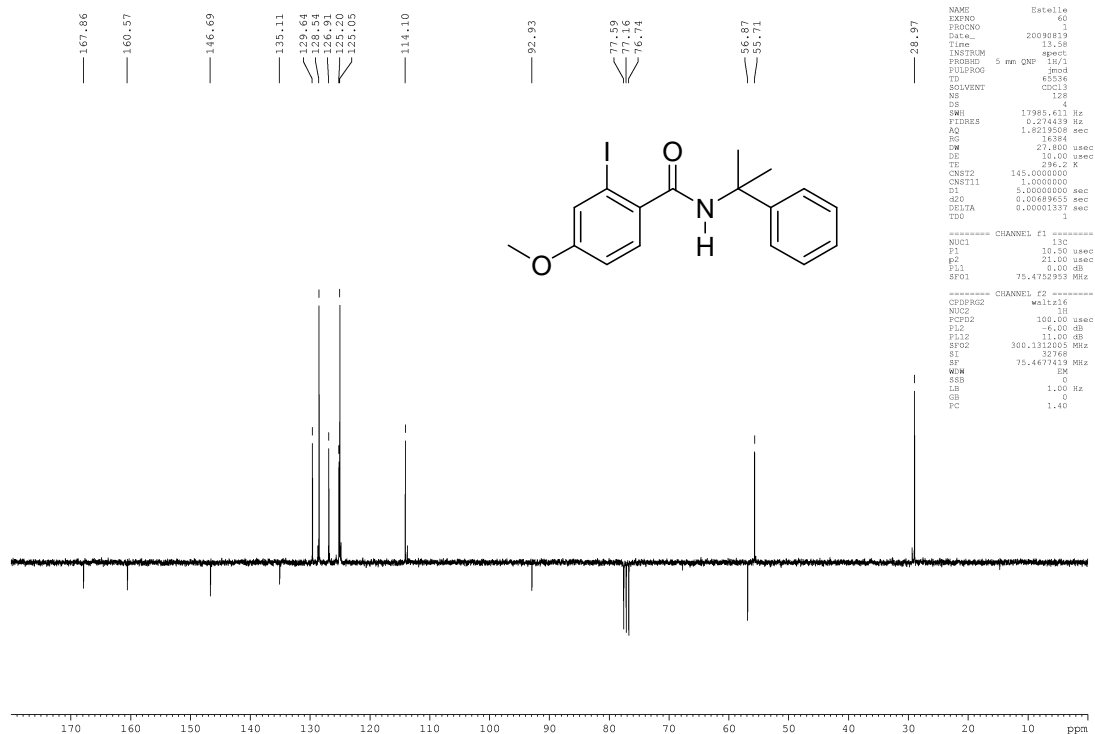

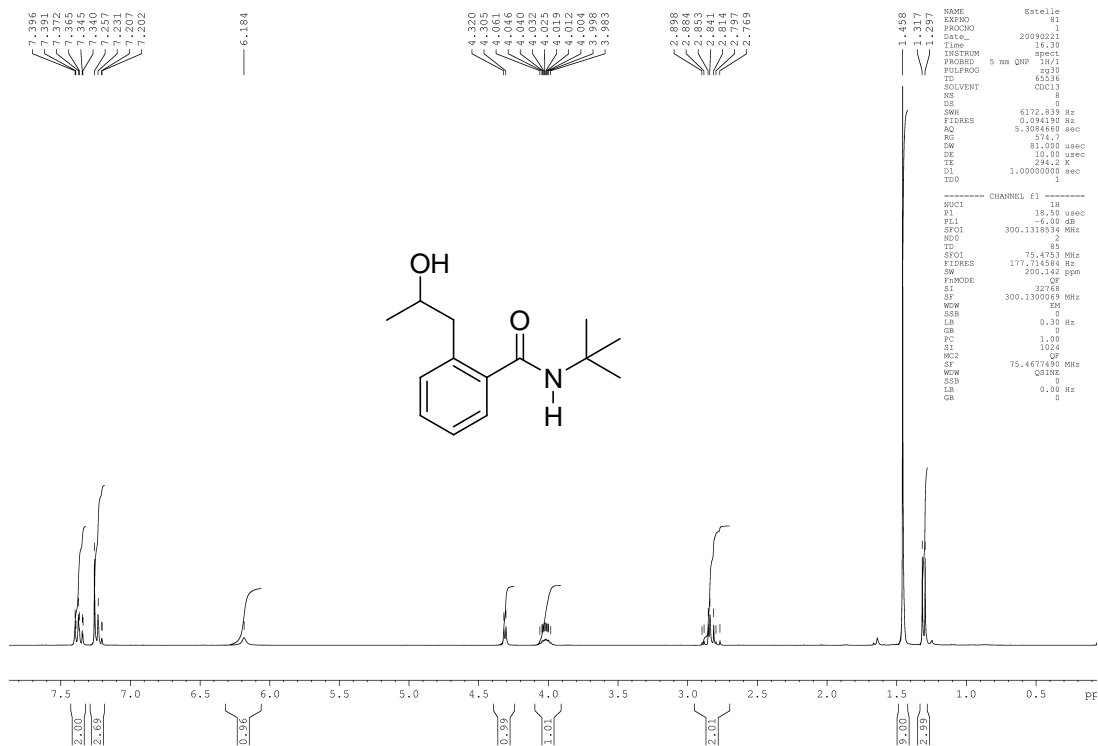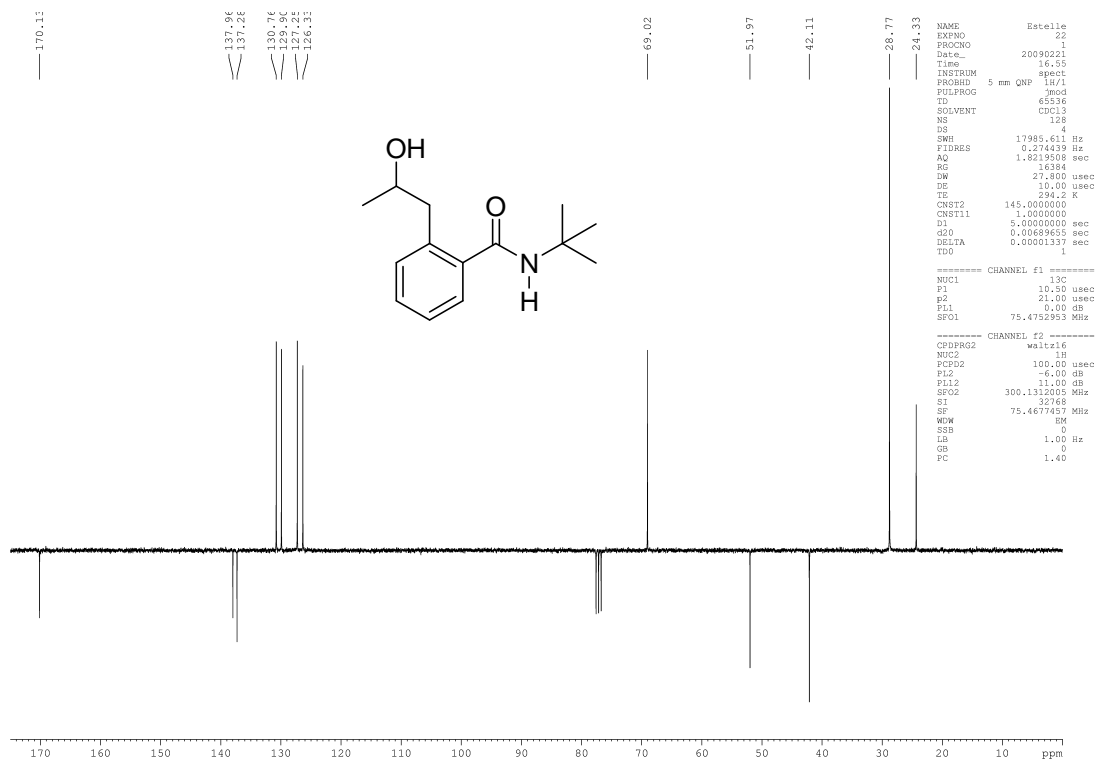



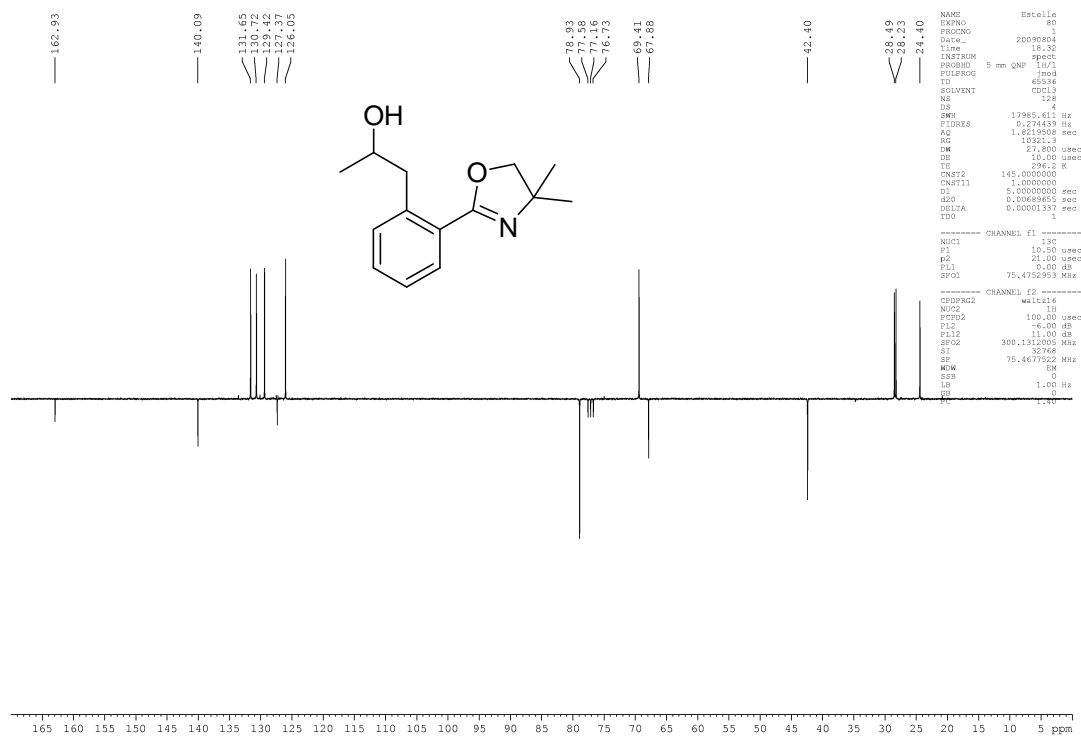

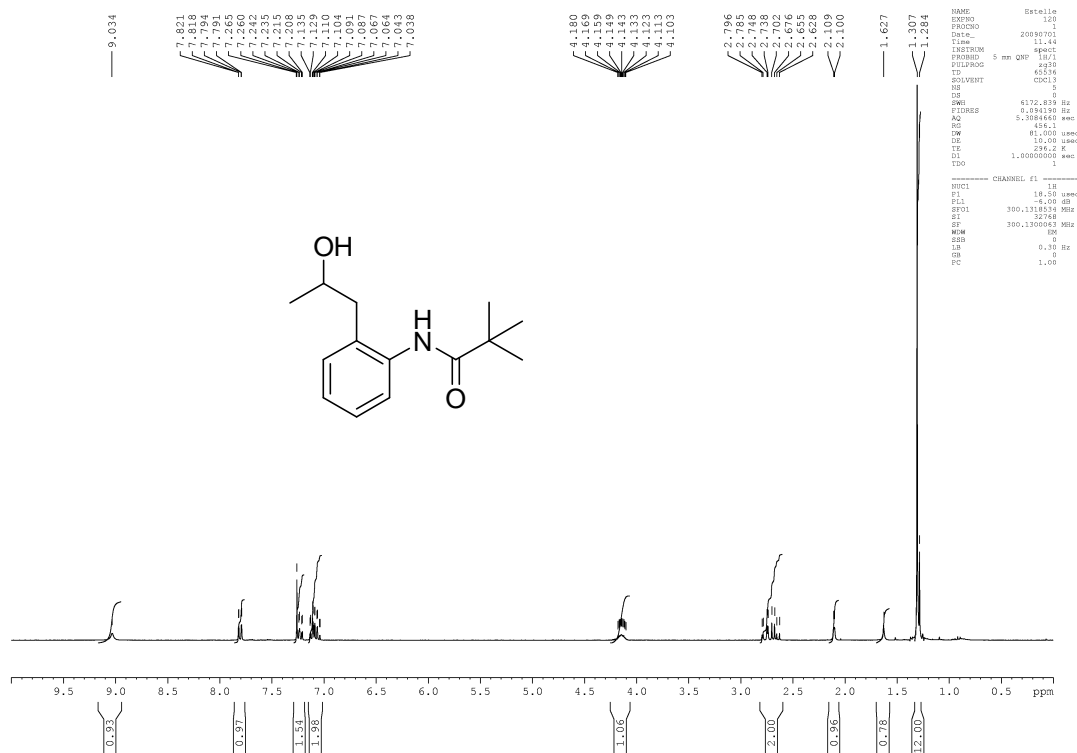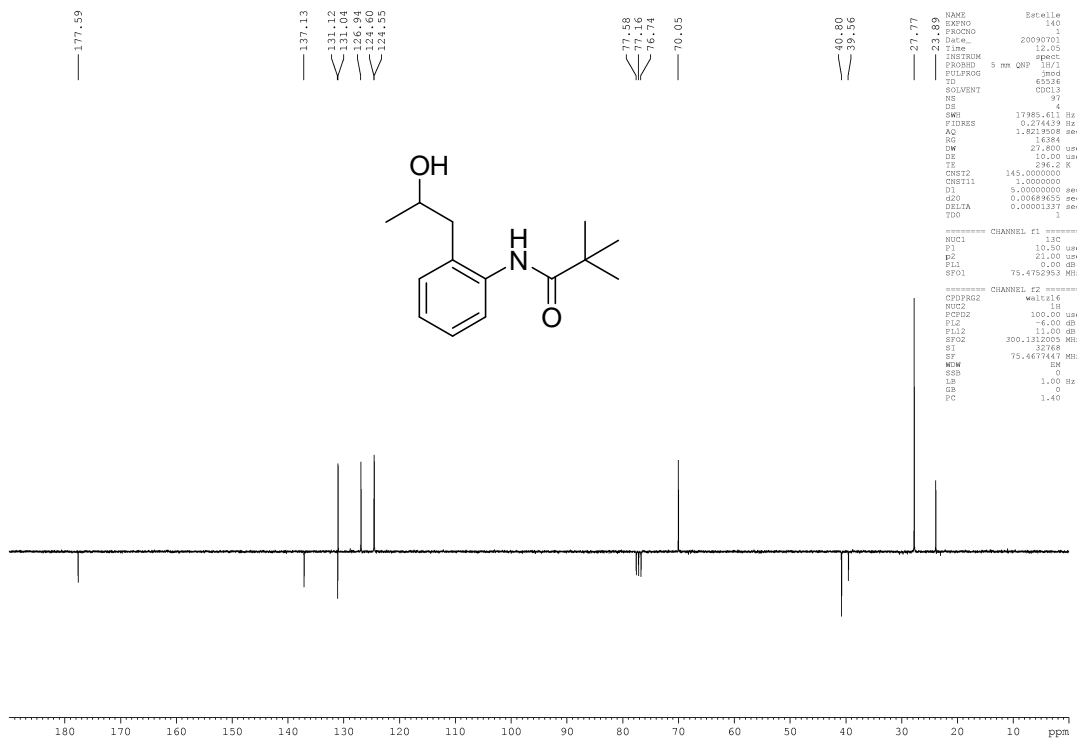

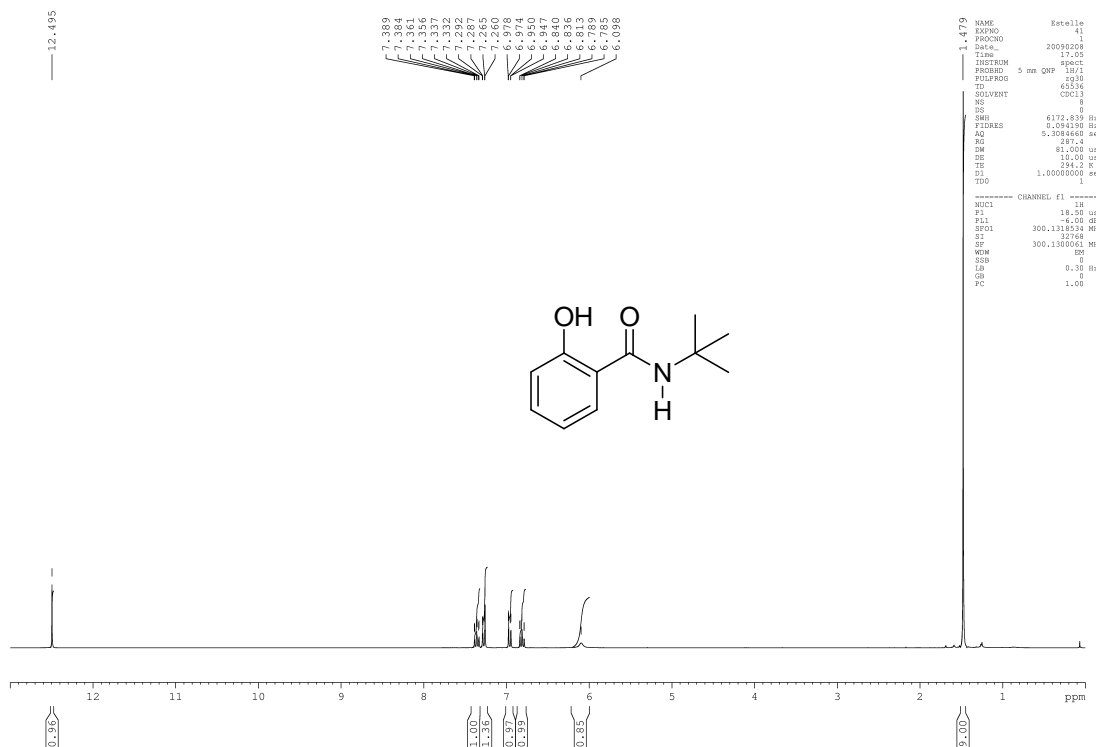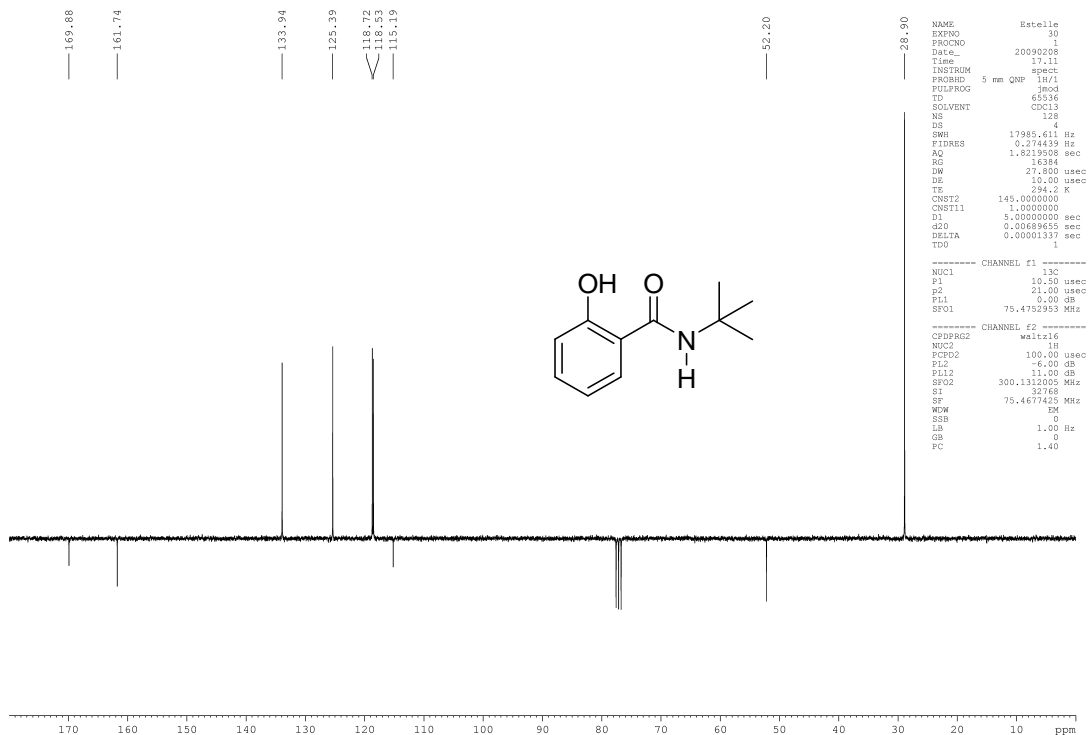

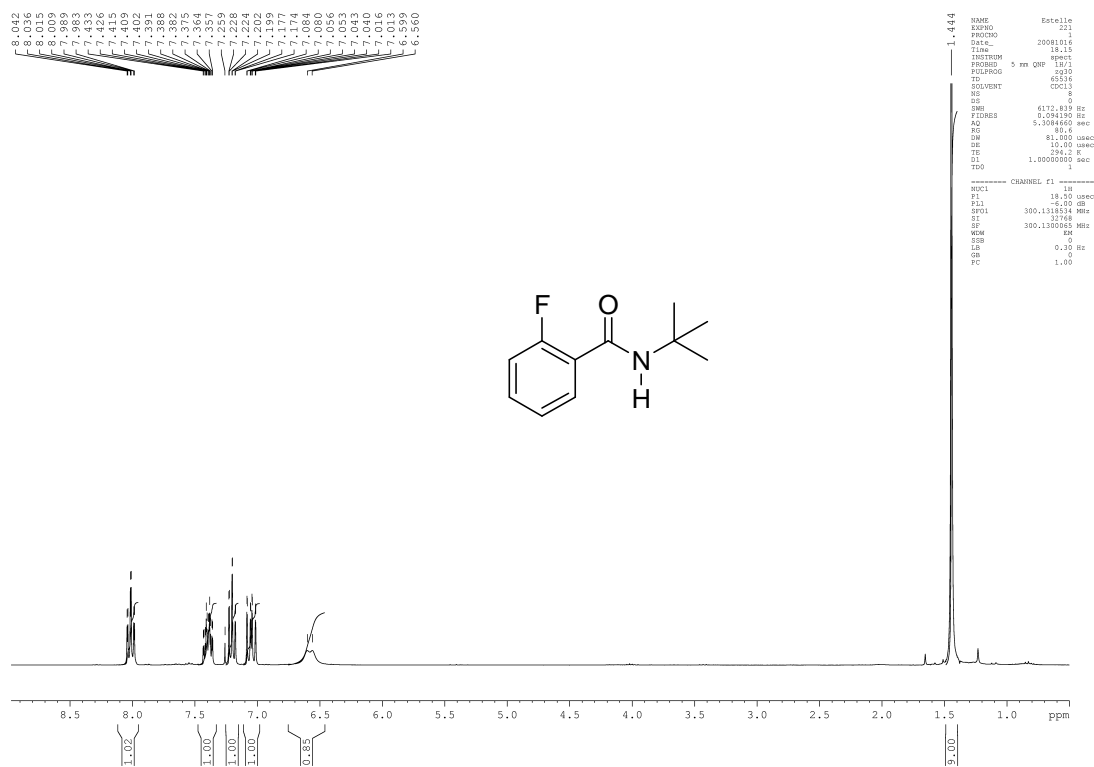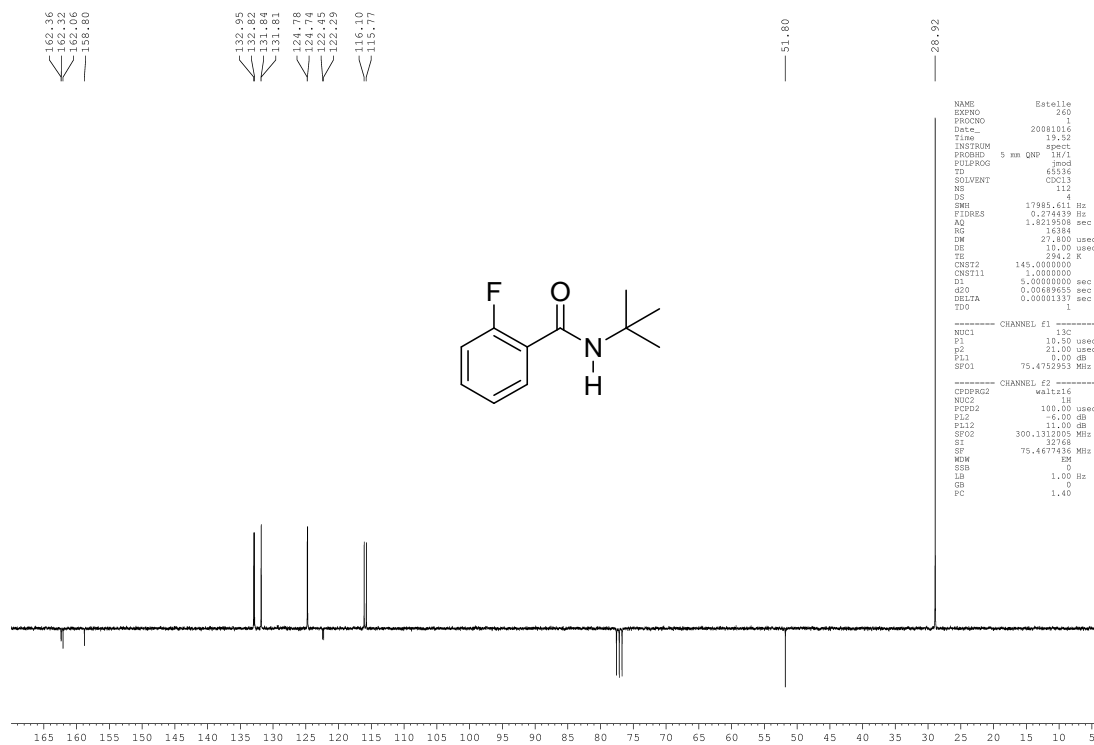

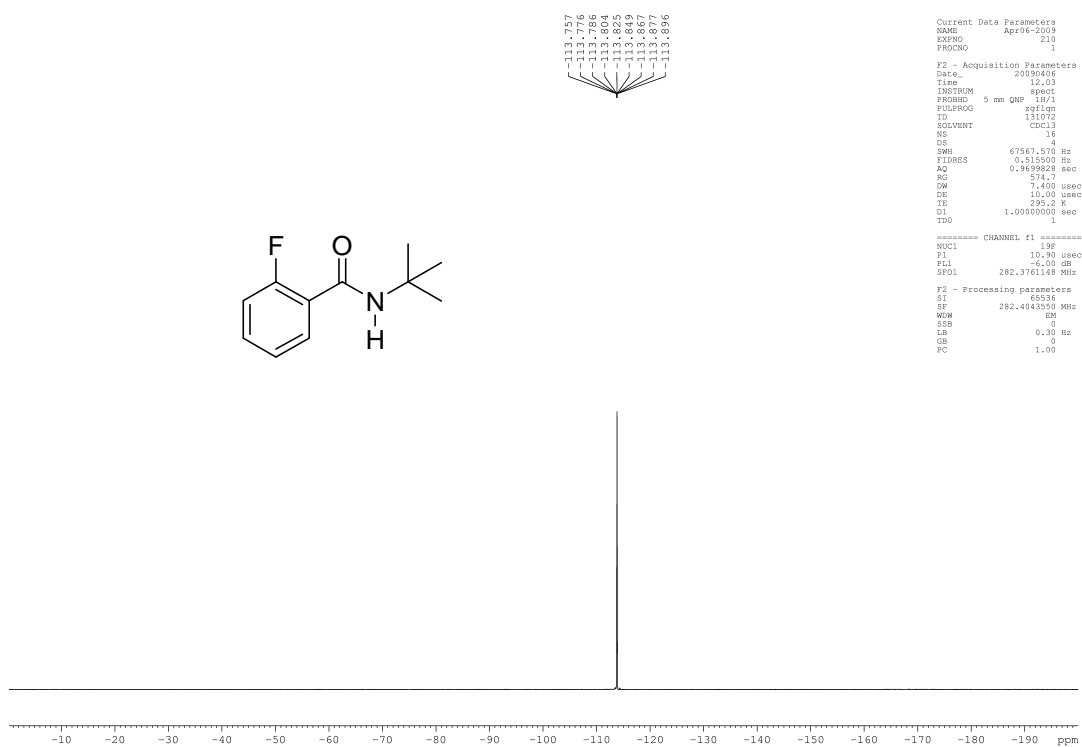

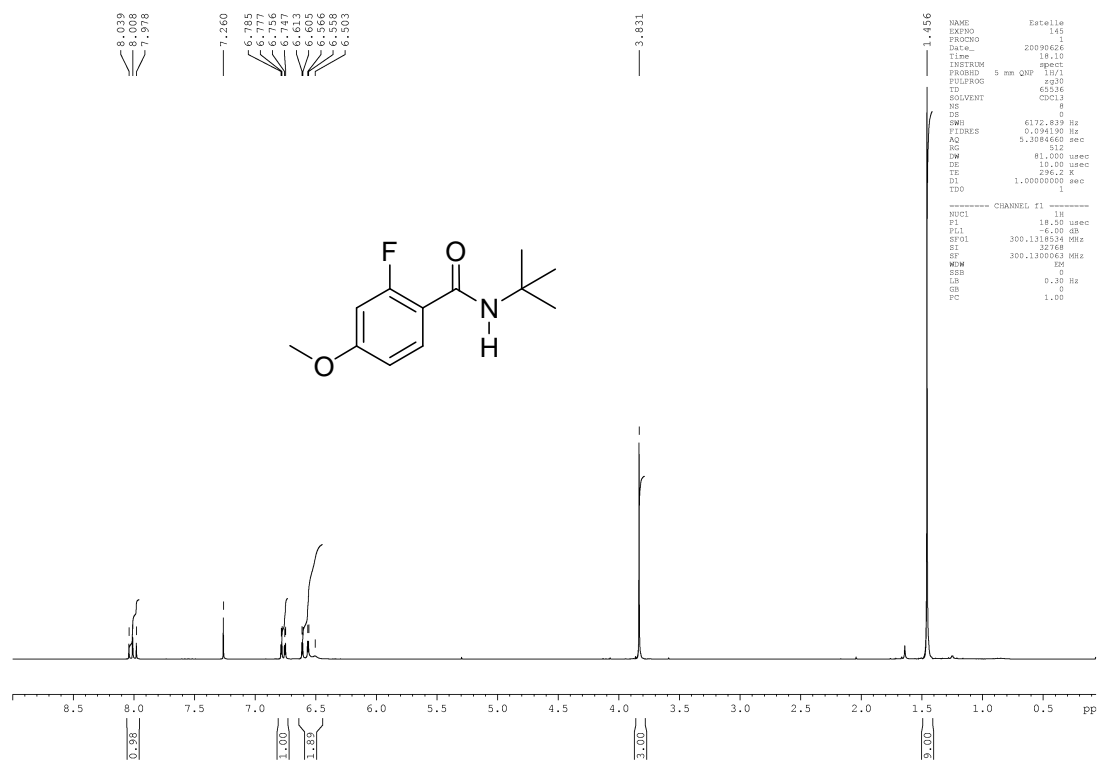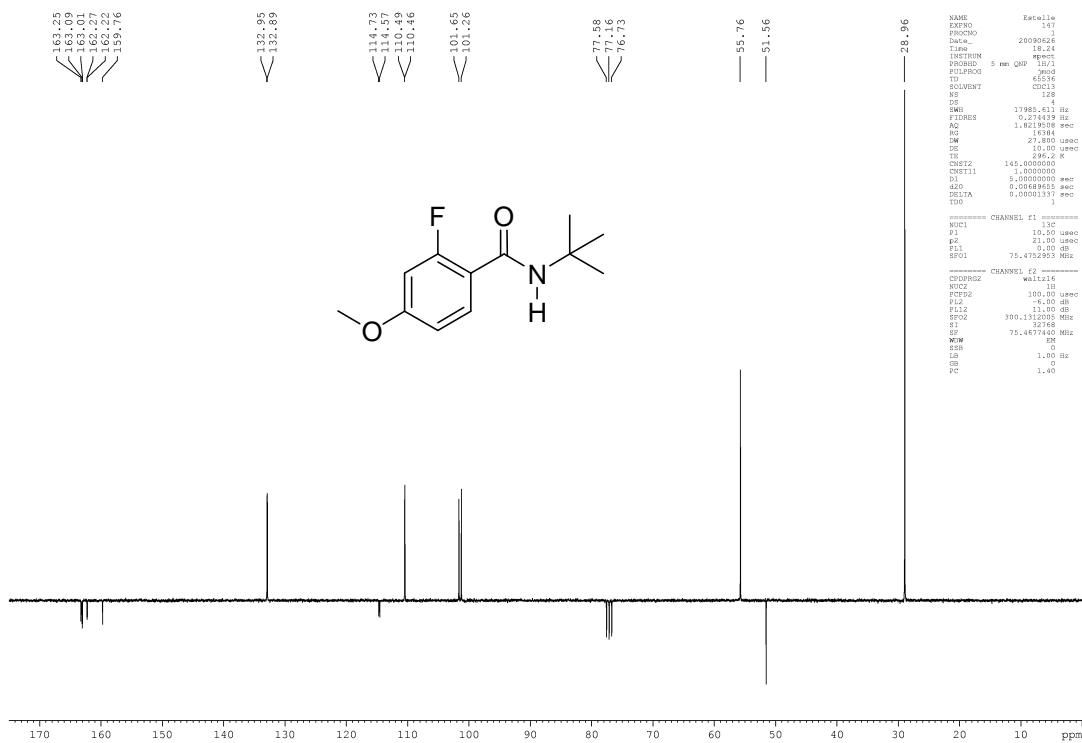

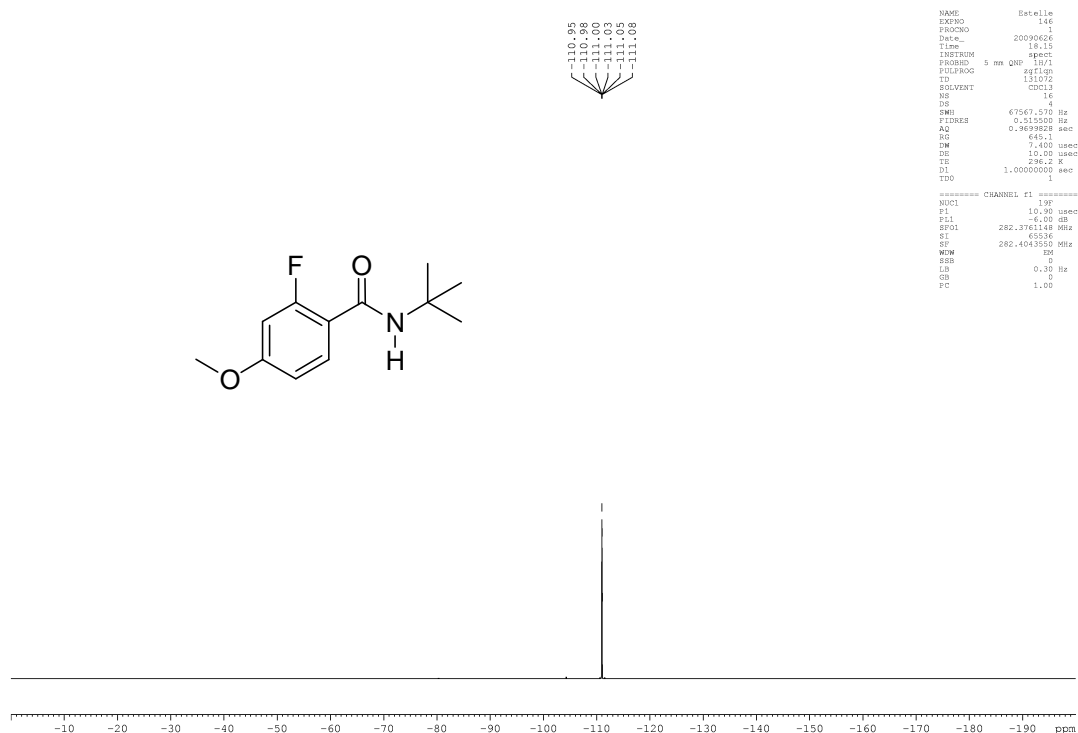

```

NAME      Estelle
EXPNO     146
PROCNO    1
Date_     20090626
Time      18.15
INSTRUM    aggr
PROBHD     5 mm QNP 1H/1
PULPROG    zgpg30
TD         131072
SOLVENT    CDCl3
NS         16
DS         4
SWH        67567.570 Hz
FIDRES     0.315500 Hz
AQ         0.3699828 sec
RG         640.1
DM         7.400 usec
DE         10.00 usec
TE         296.2 K
D1         1.00000000 sec
TD0
===== CHANNEL f1 =====
NUC1       15N
P1         10.90 usec
PL1        4.00 dB
SFO1       282.3761148 MHz
SI         65536
SF          282.4043550 MHz
WCH        RM
SFO        0
LB         0.30 Hz
GB         0
PC         1.00

```



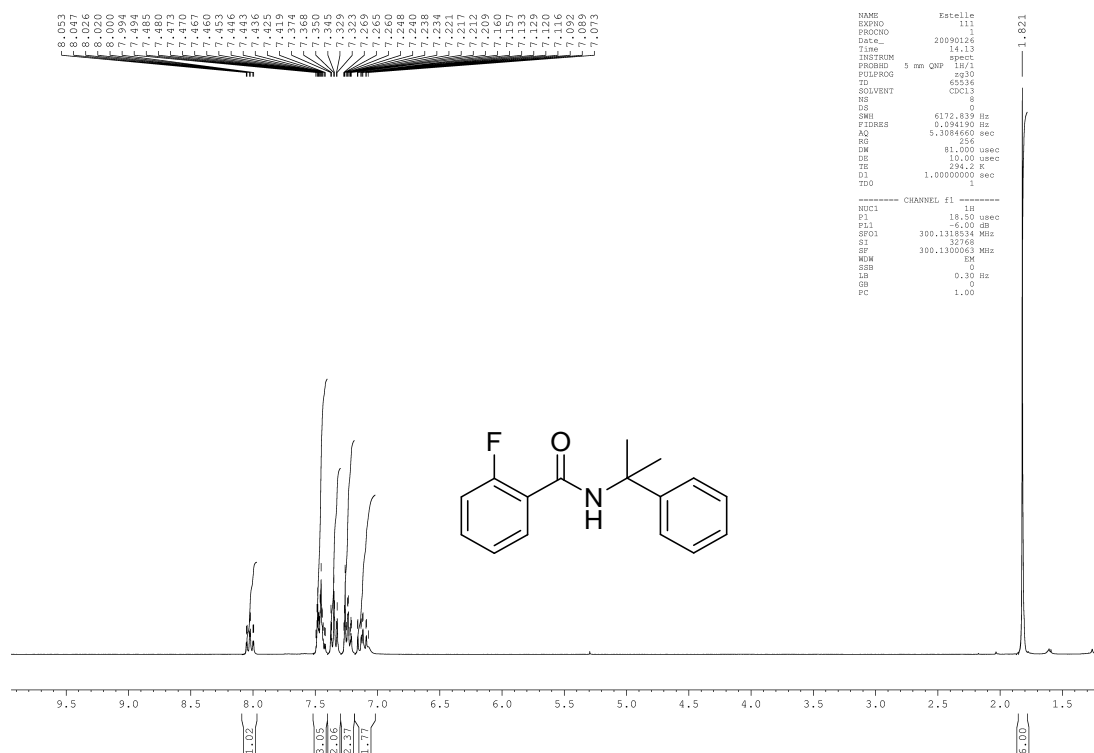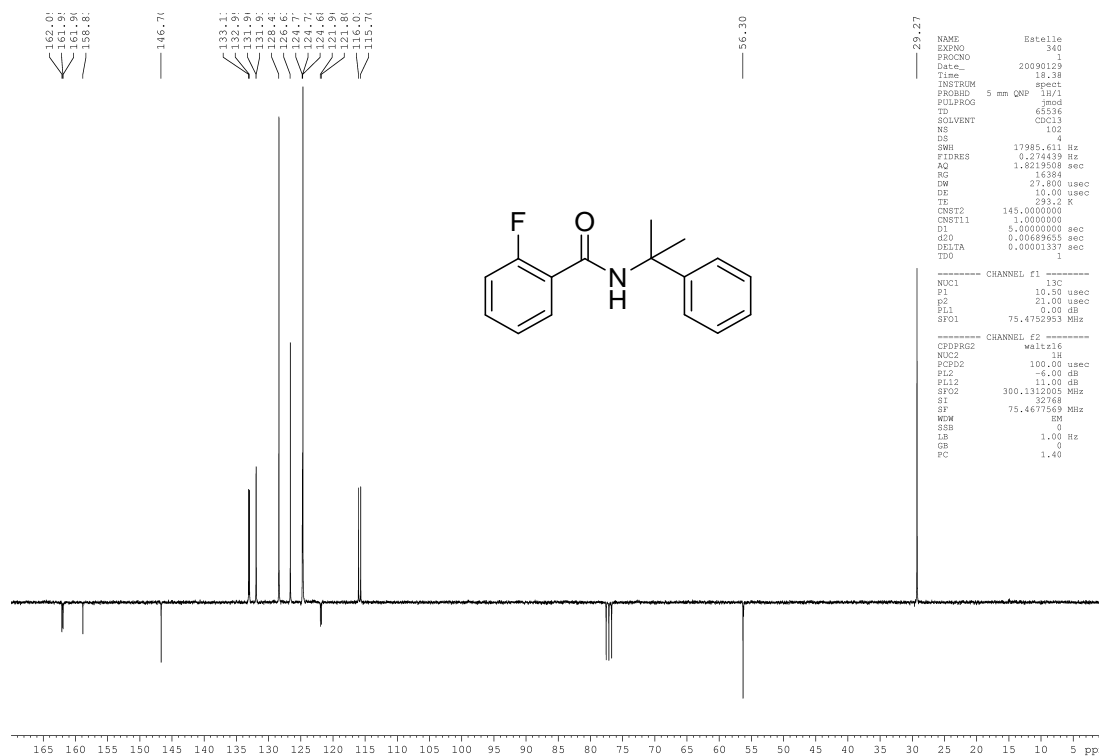

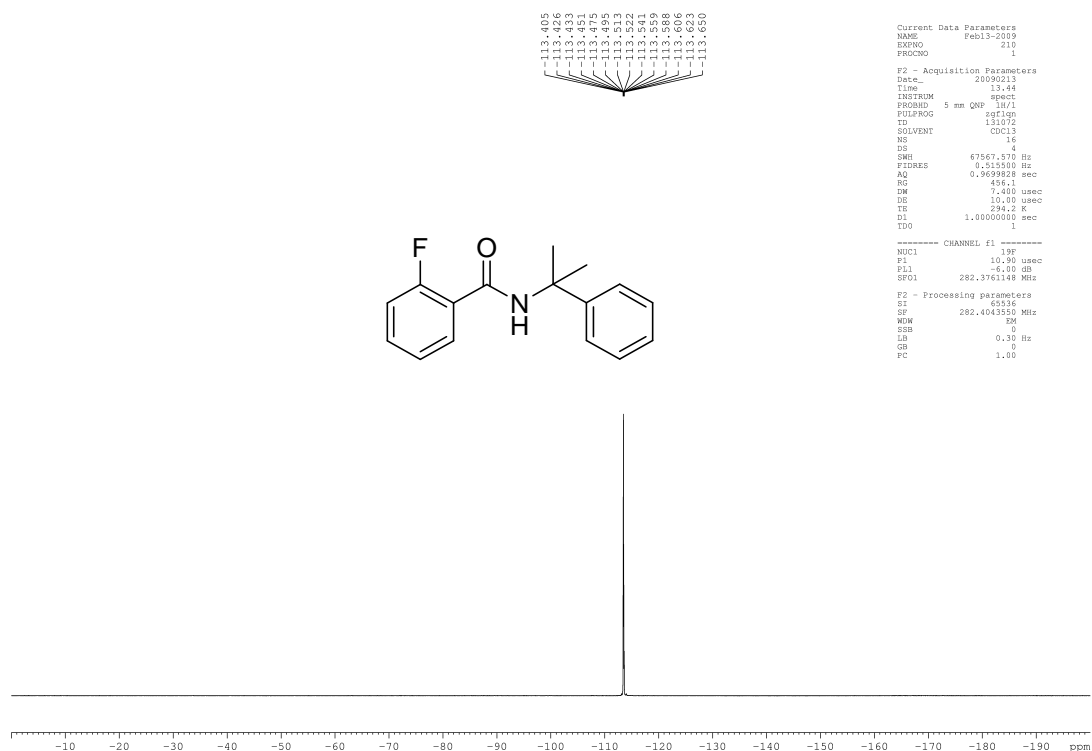

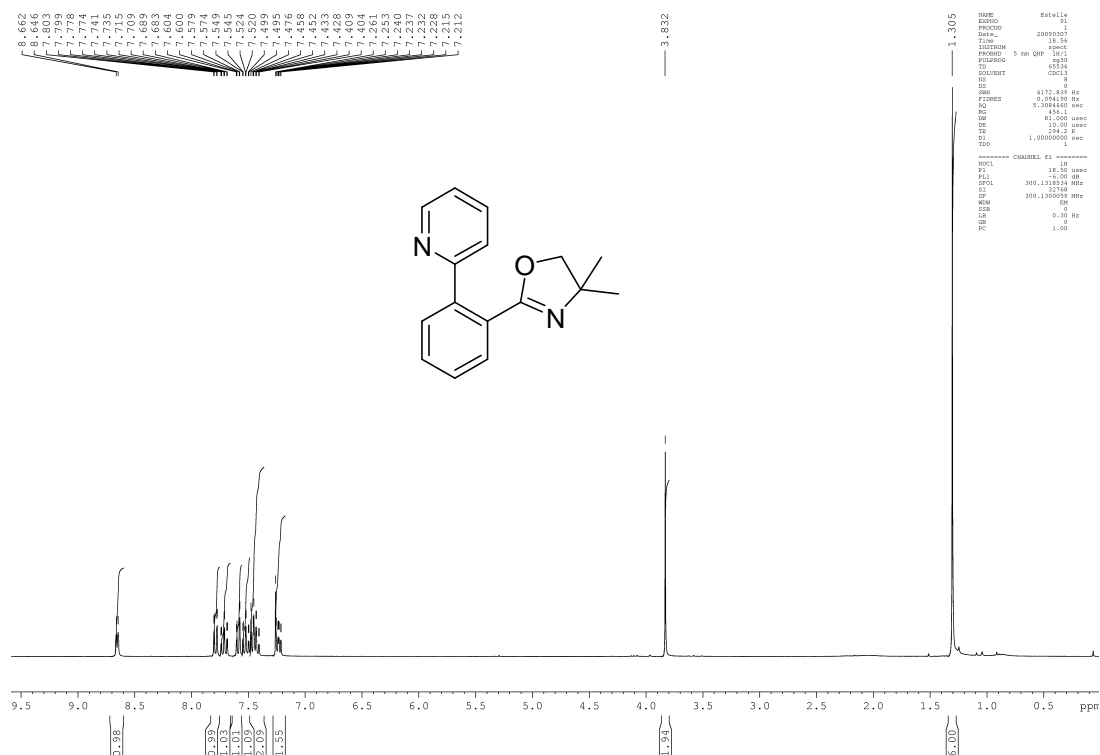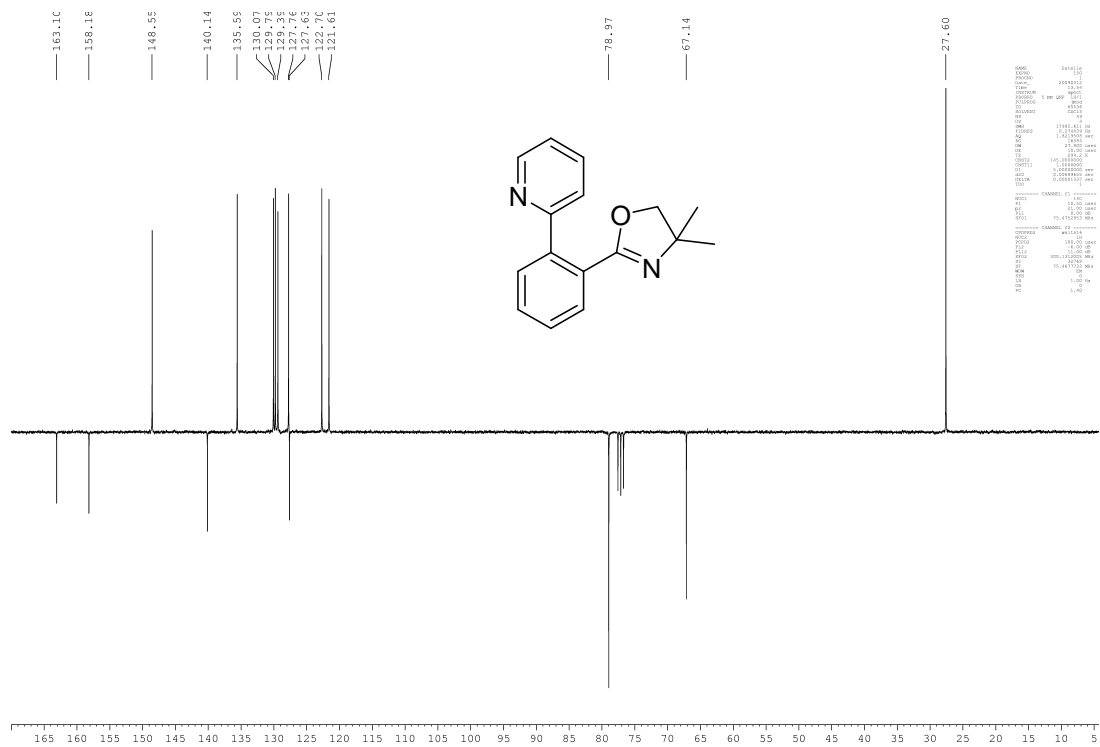

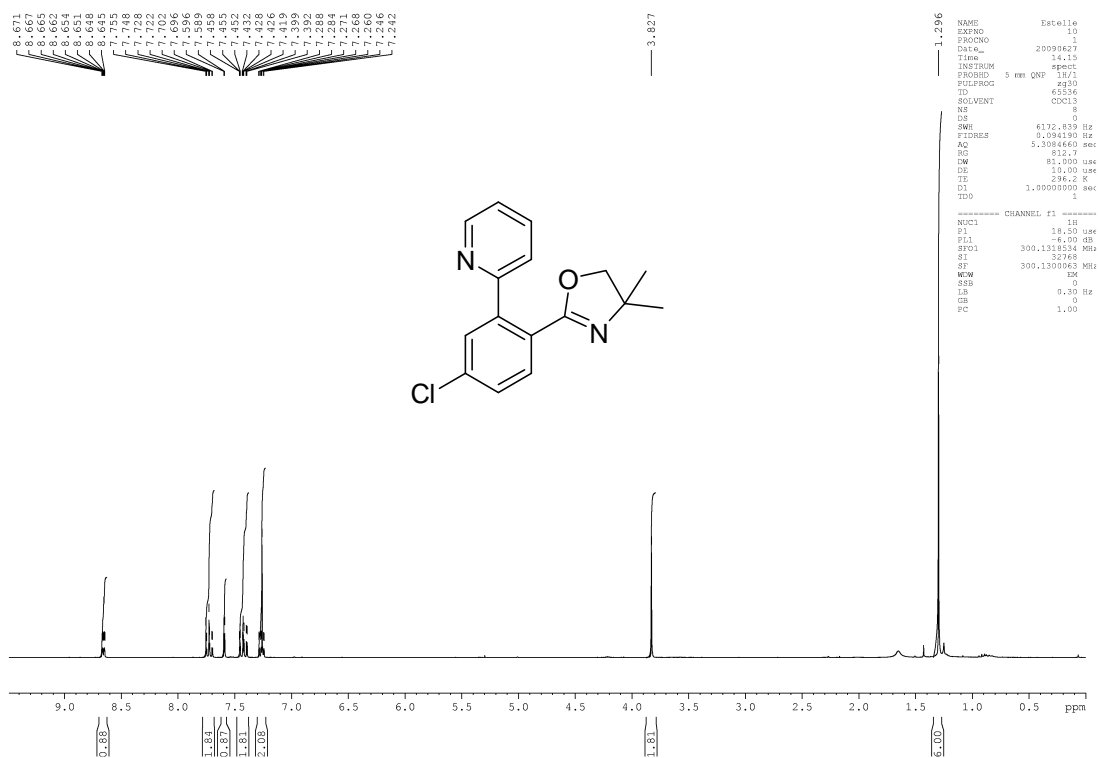

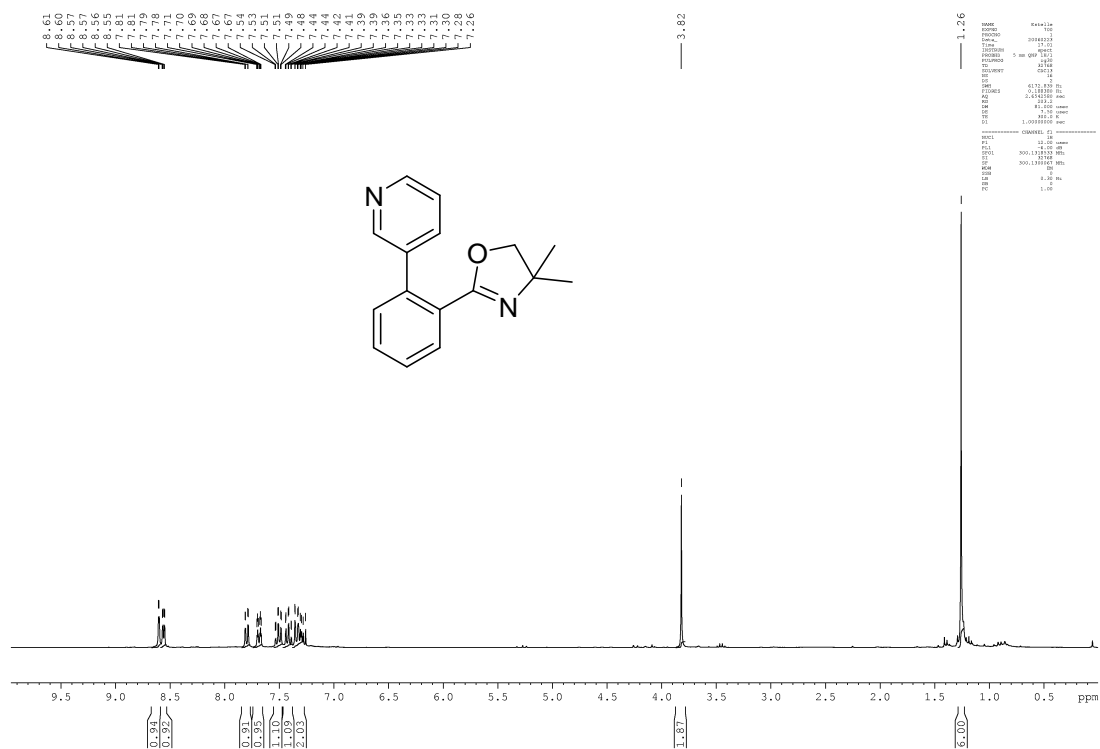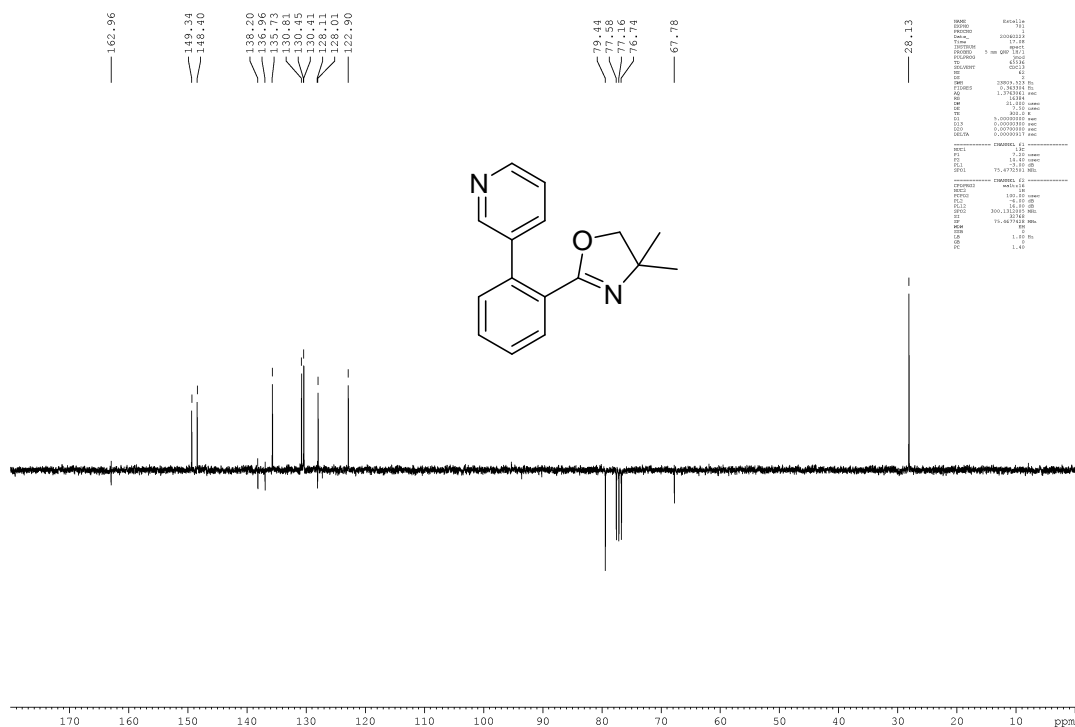

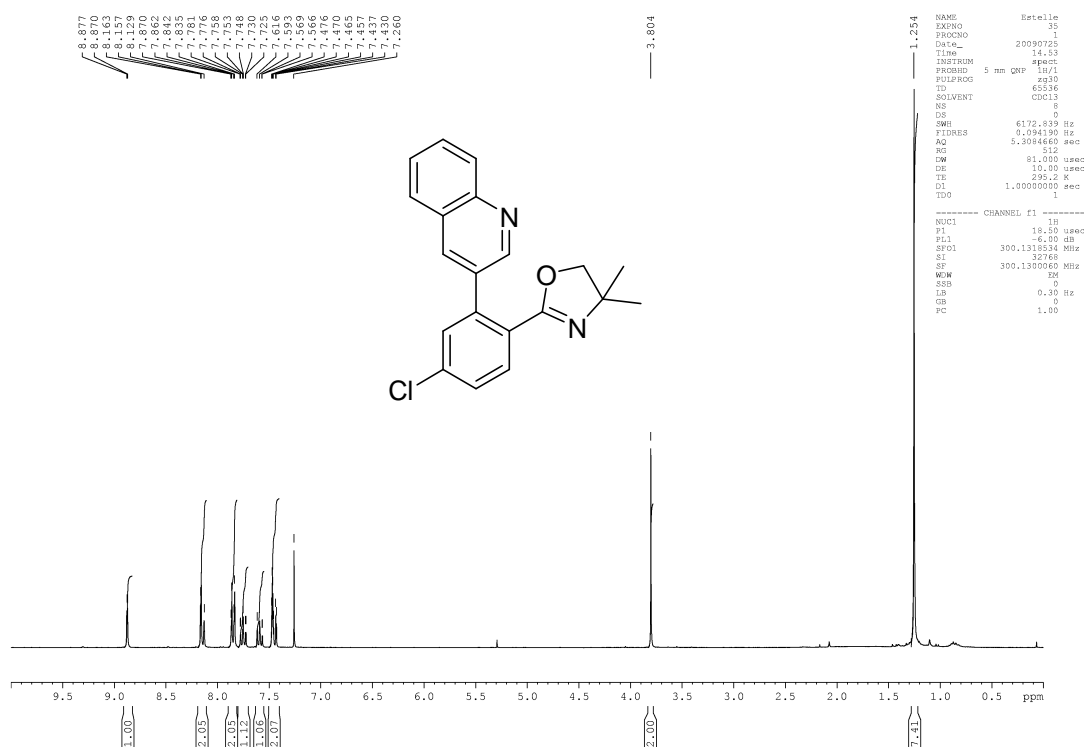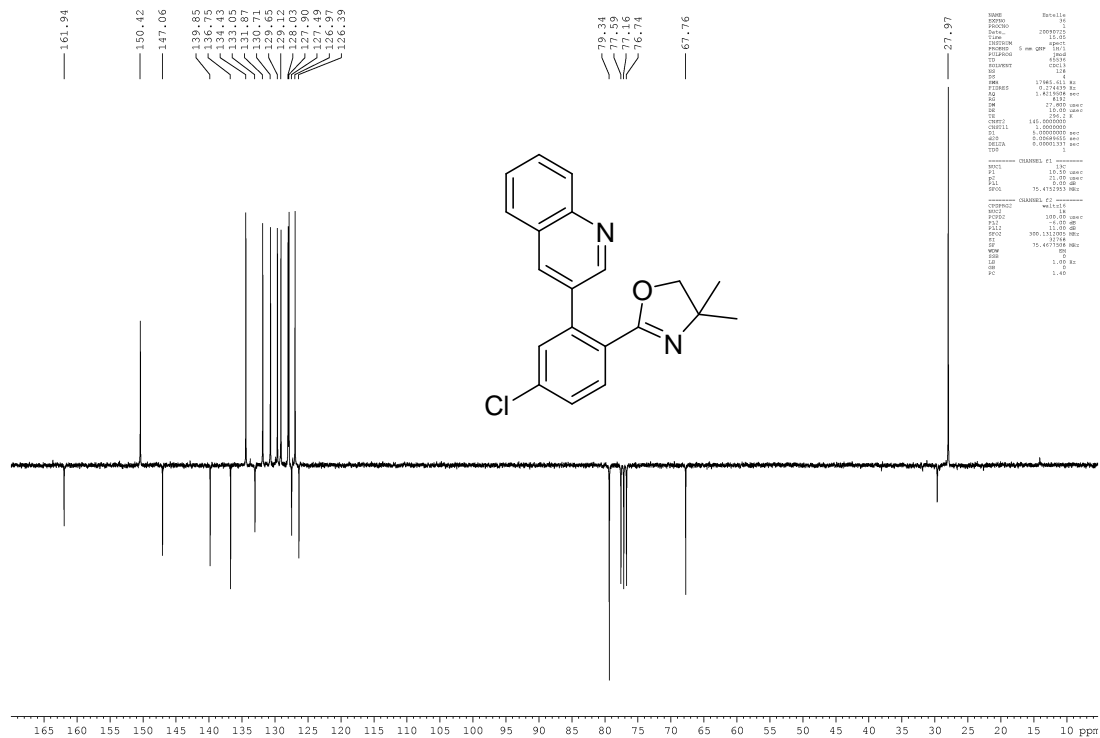

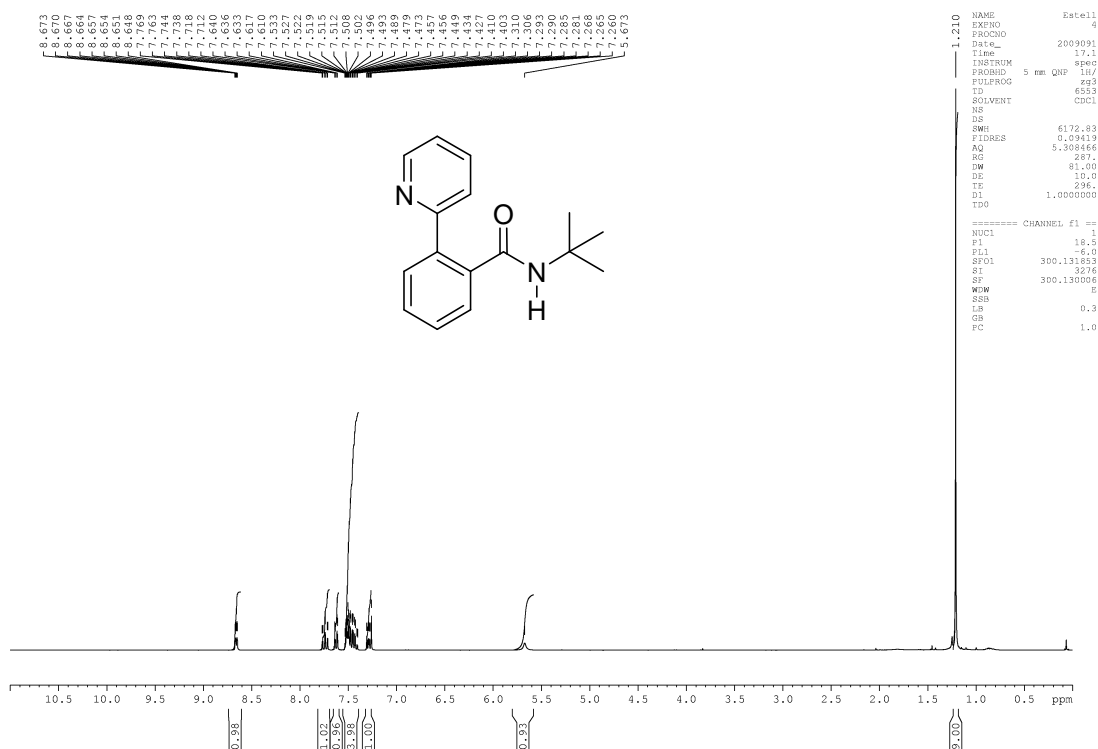



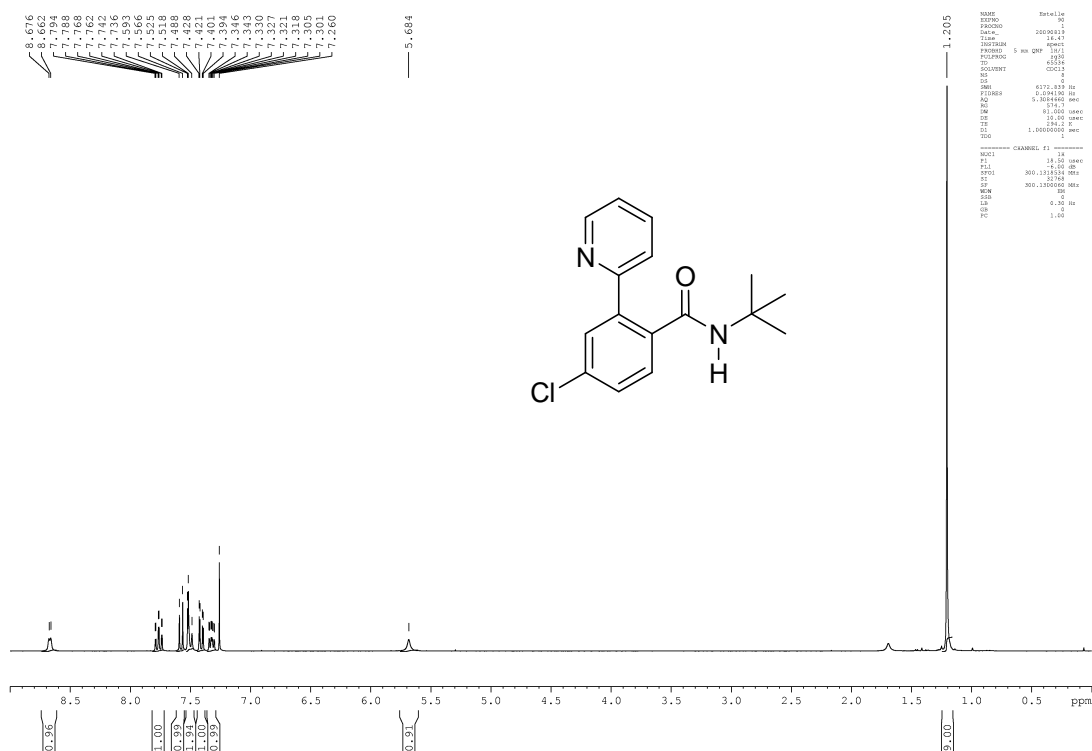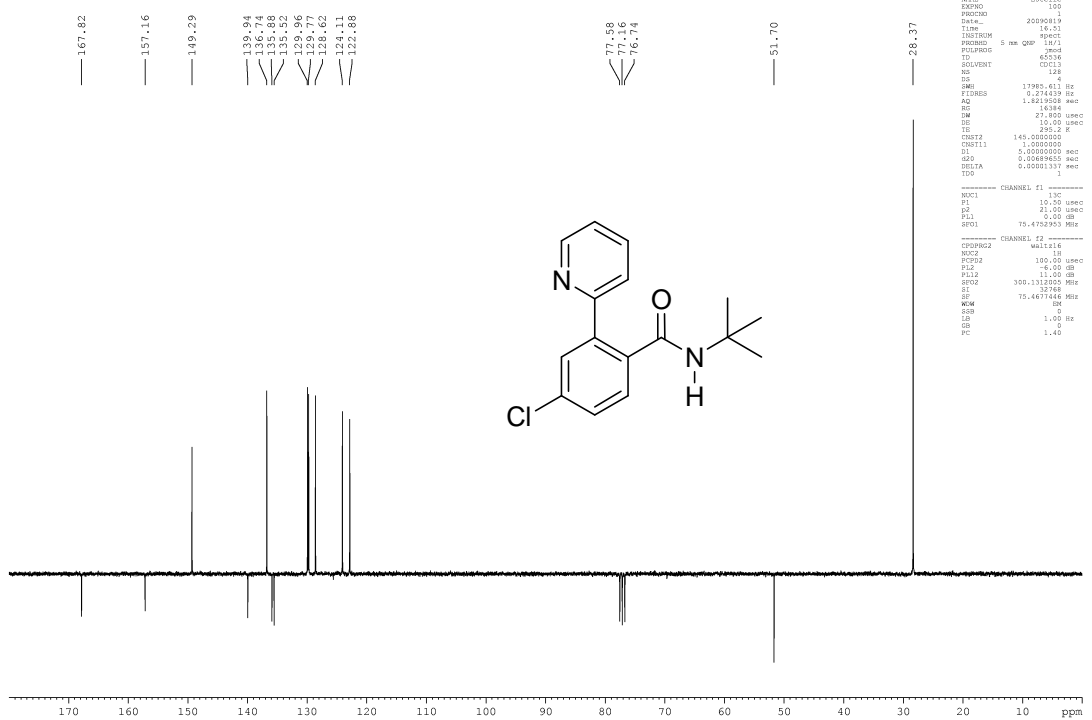

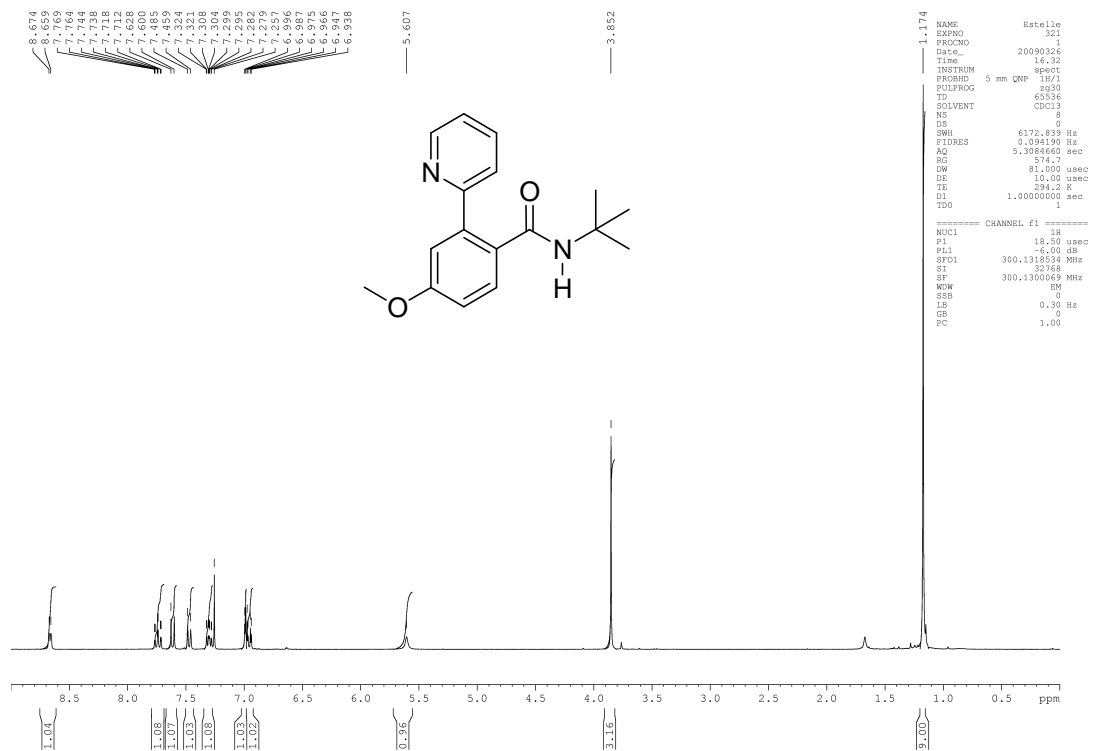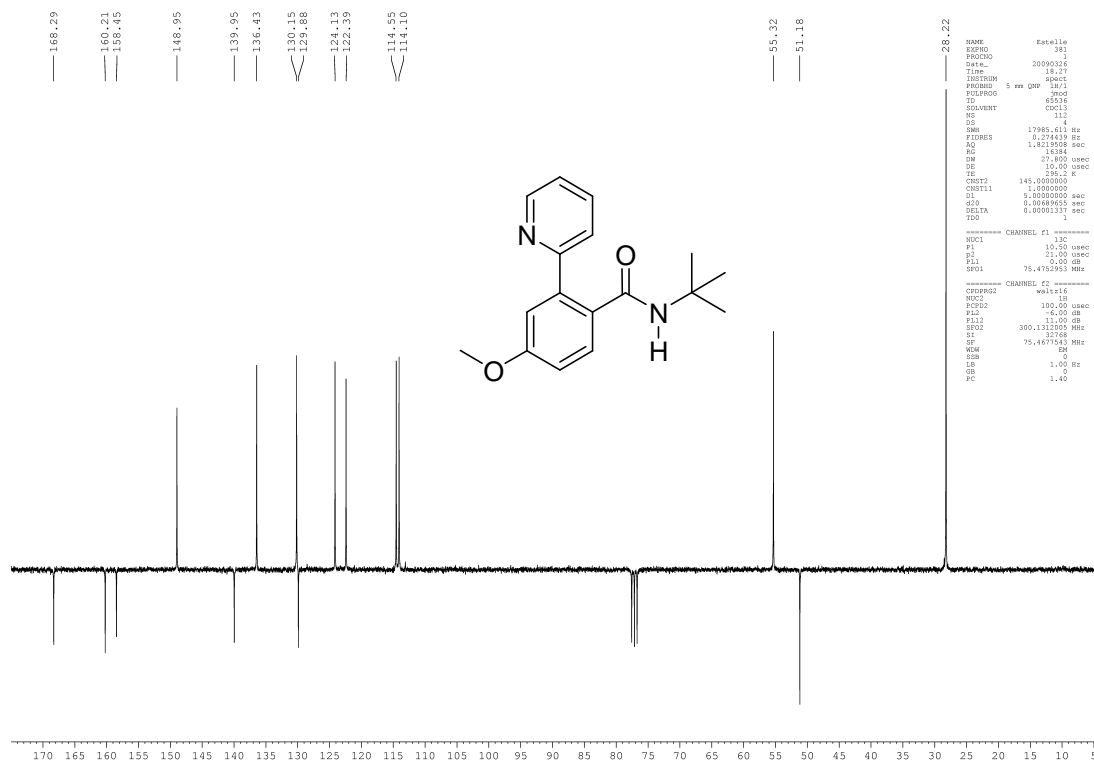

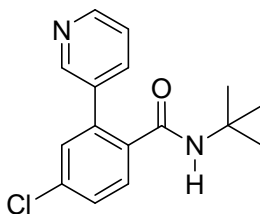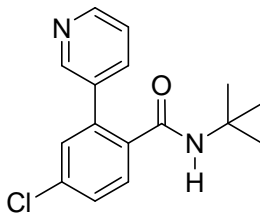

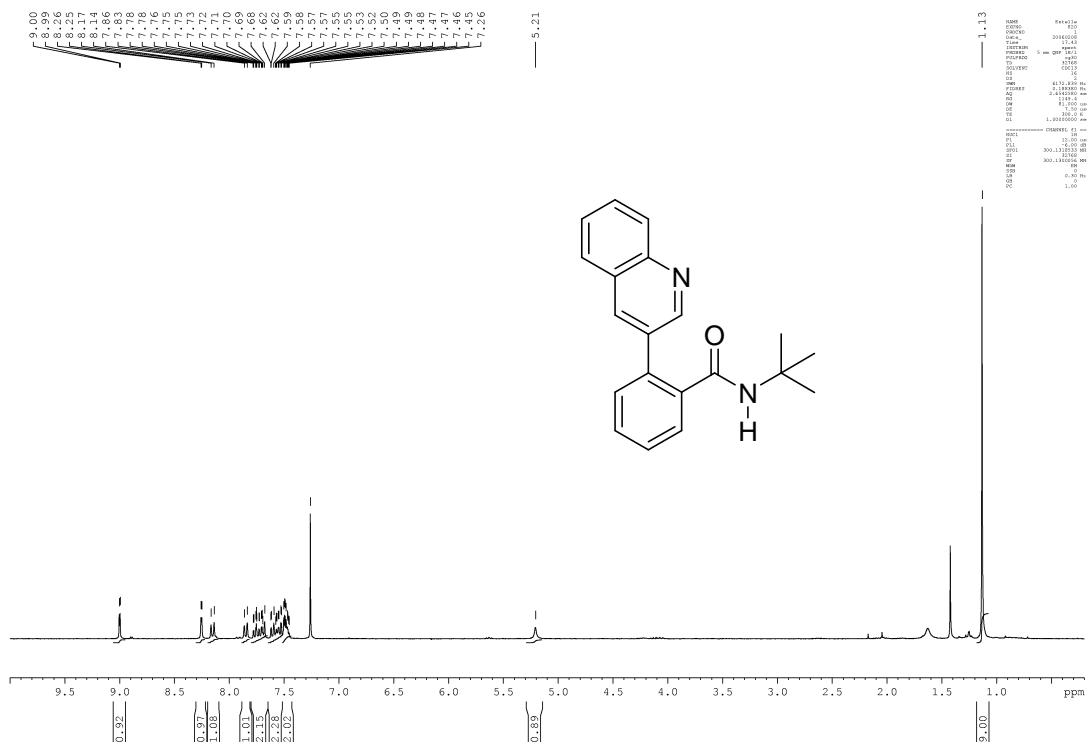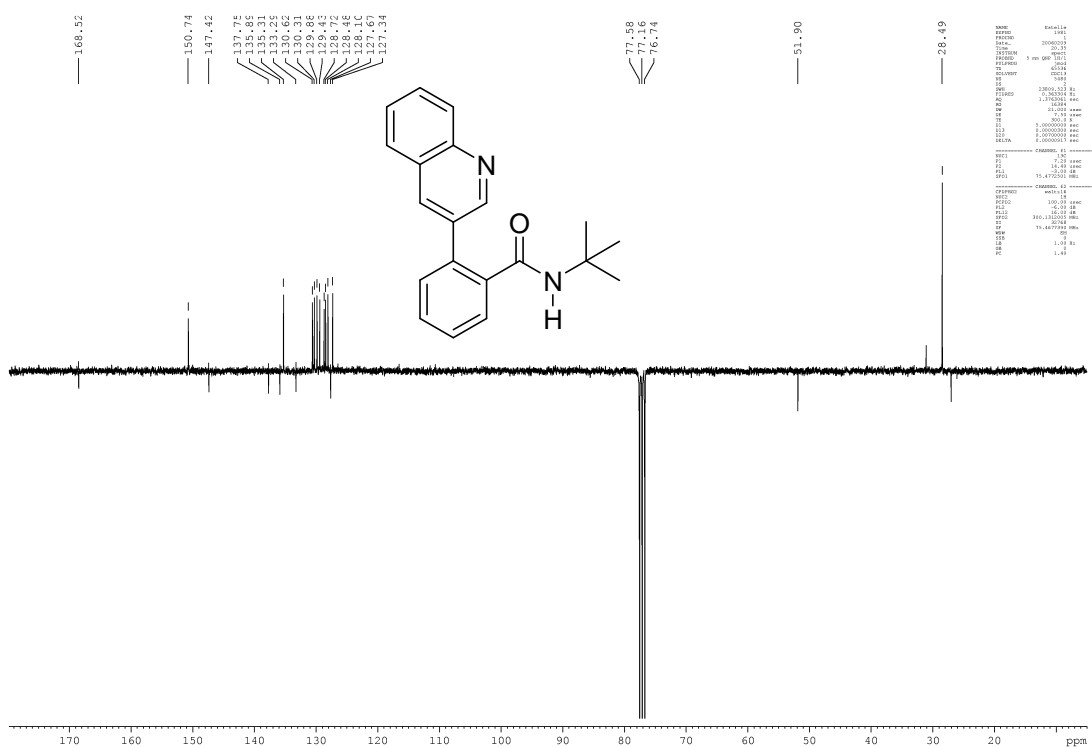

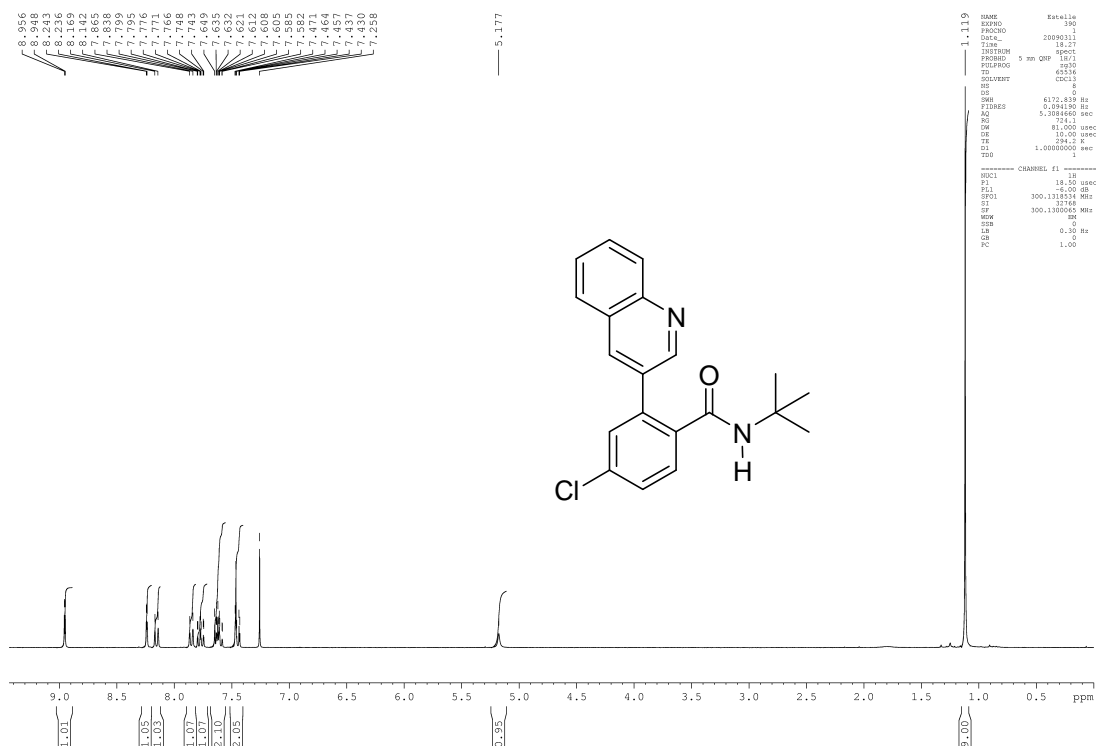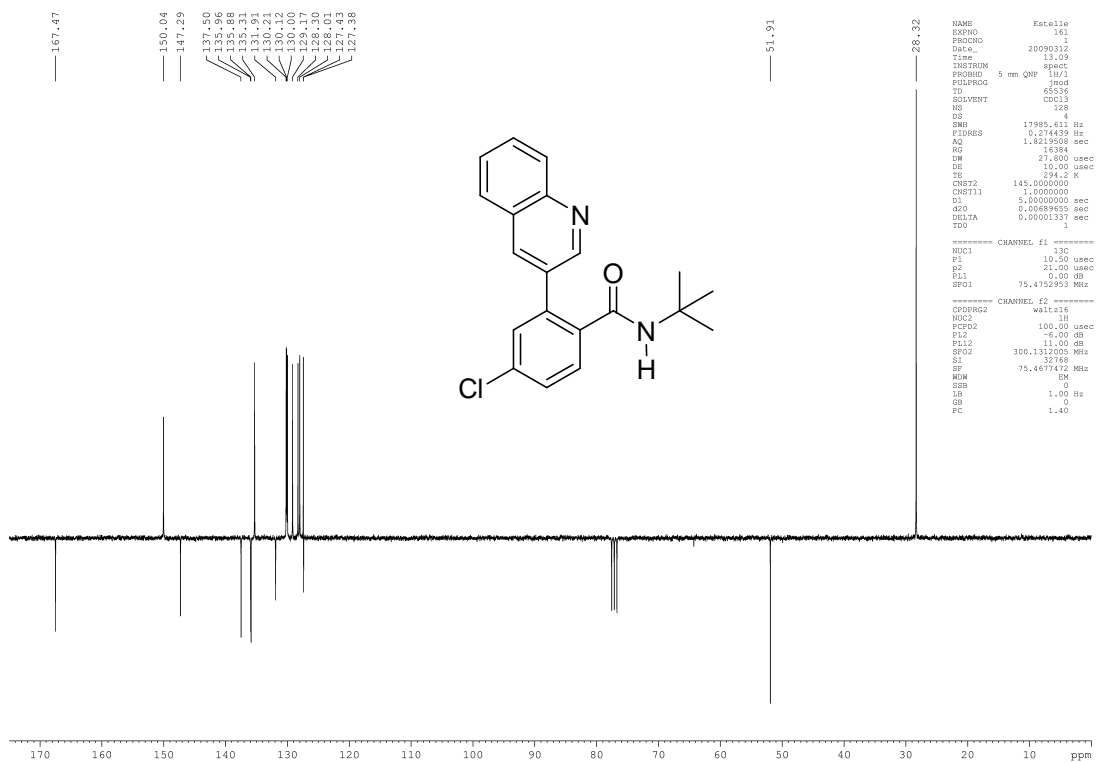

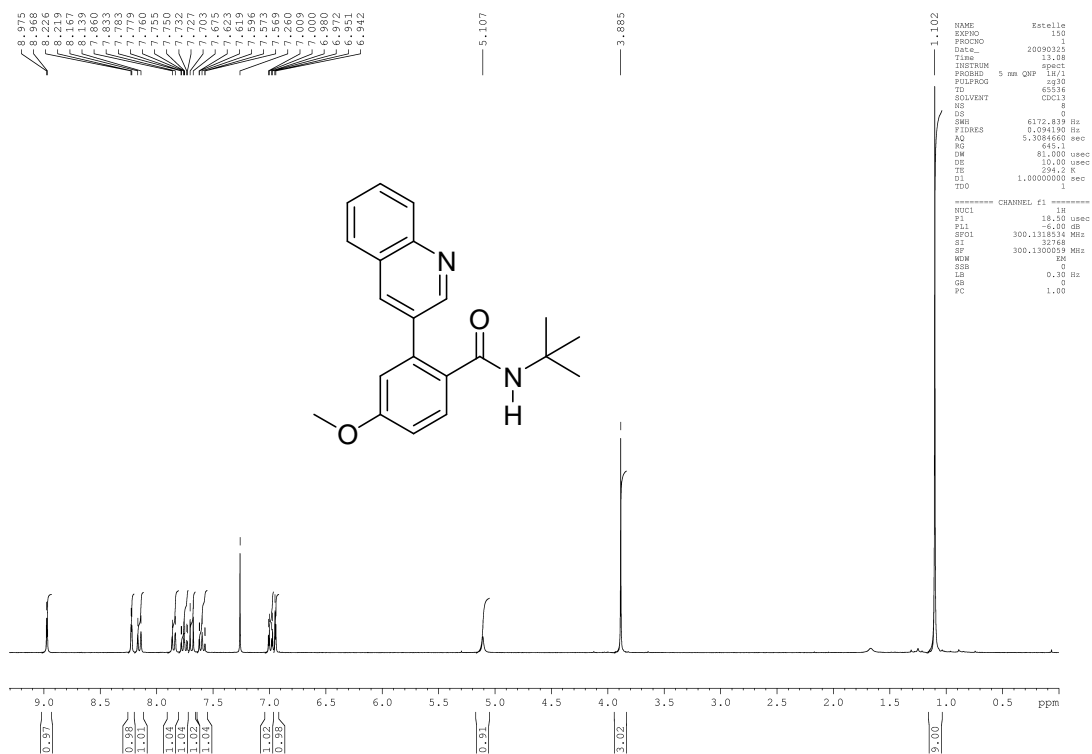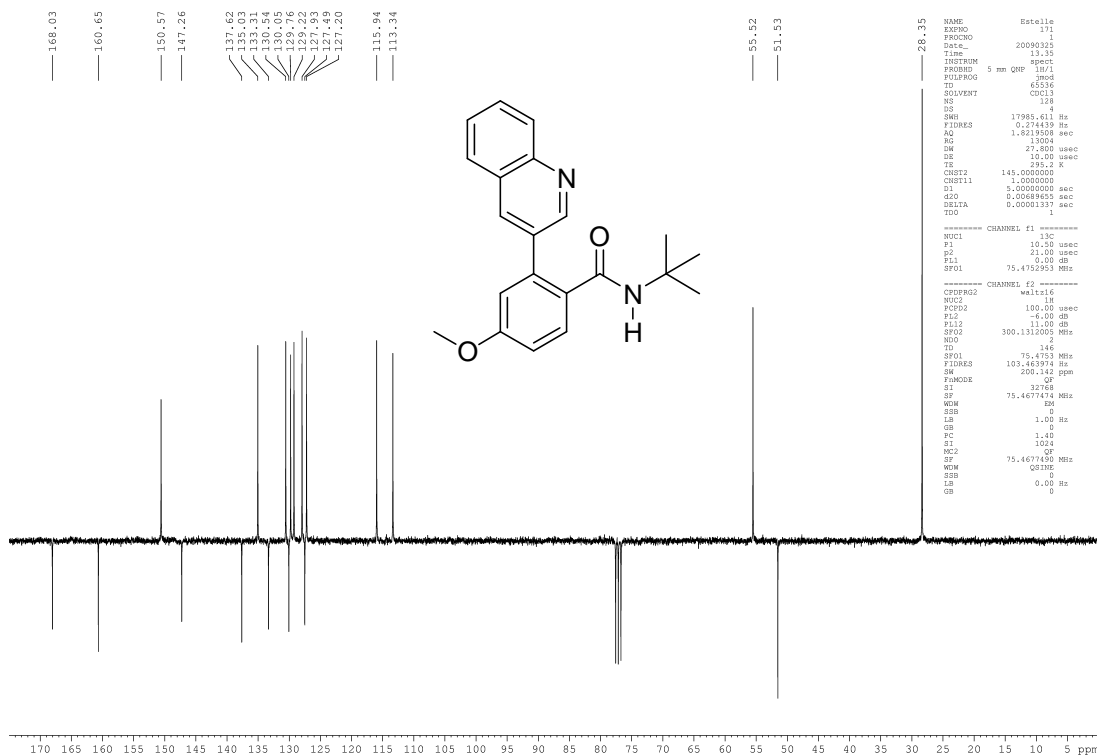

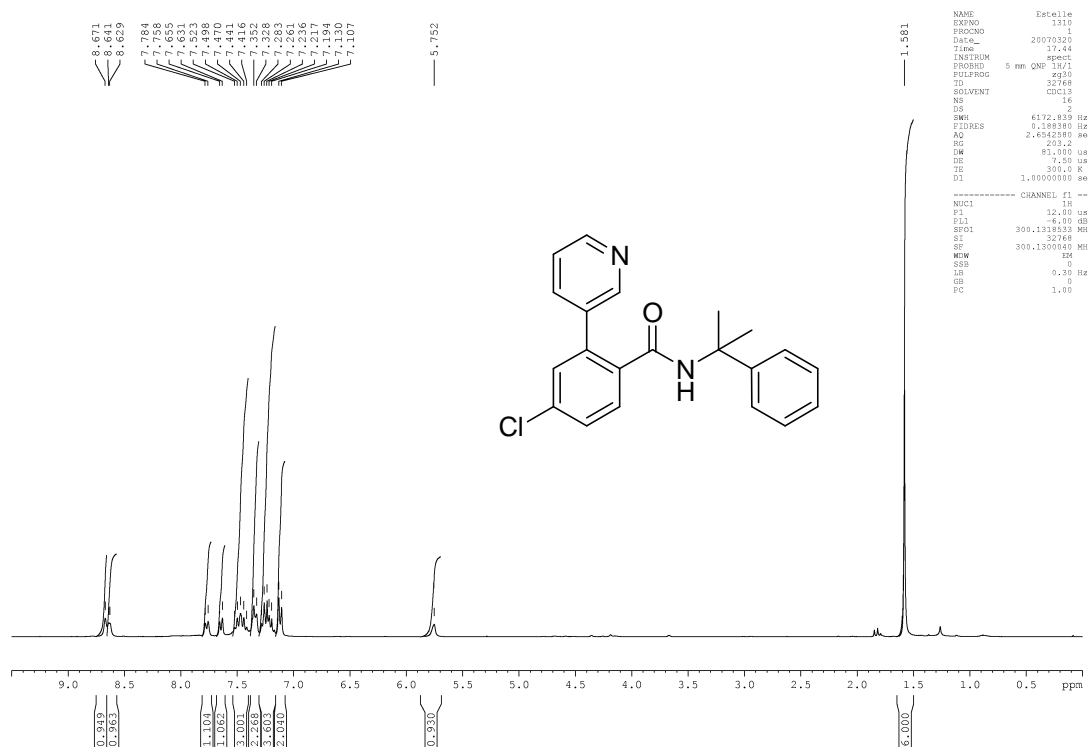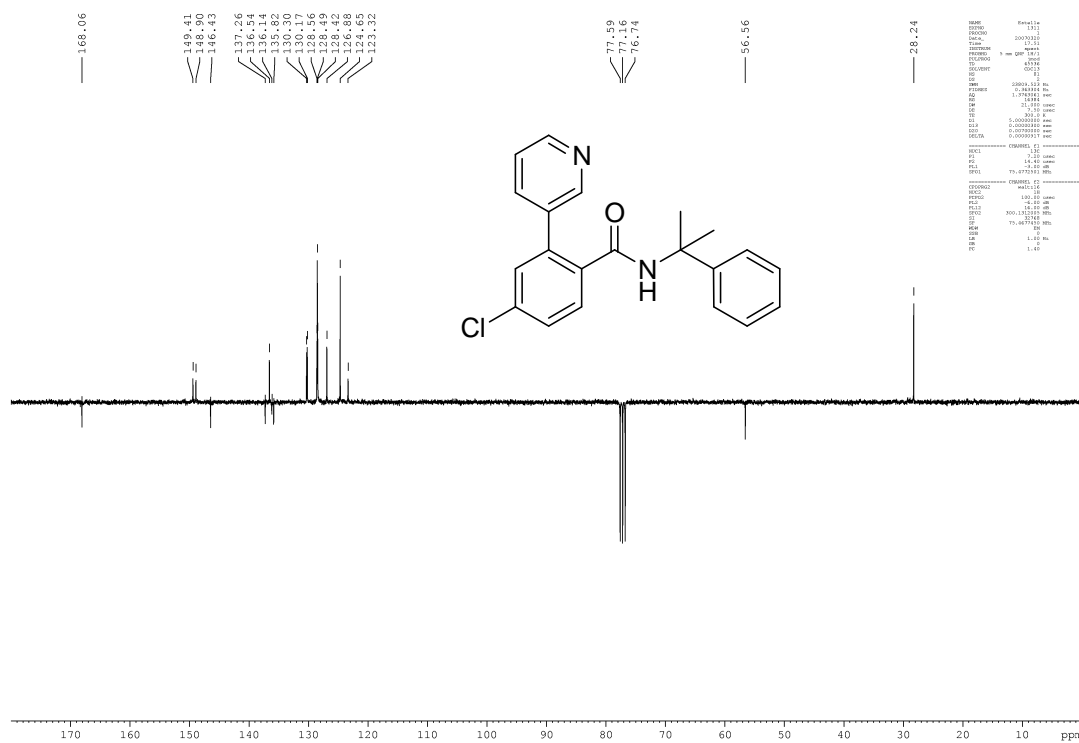

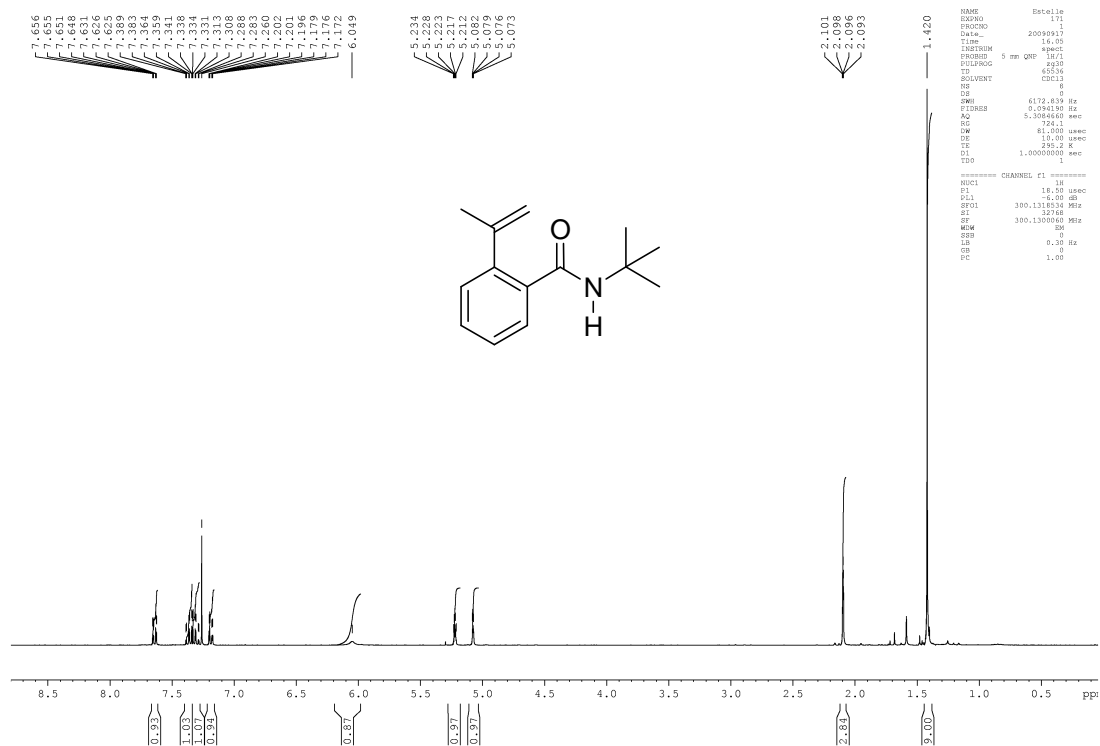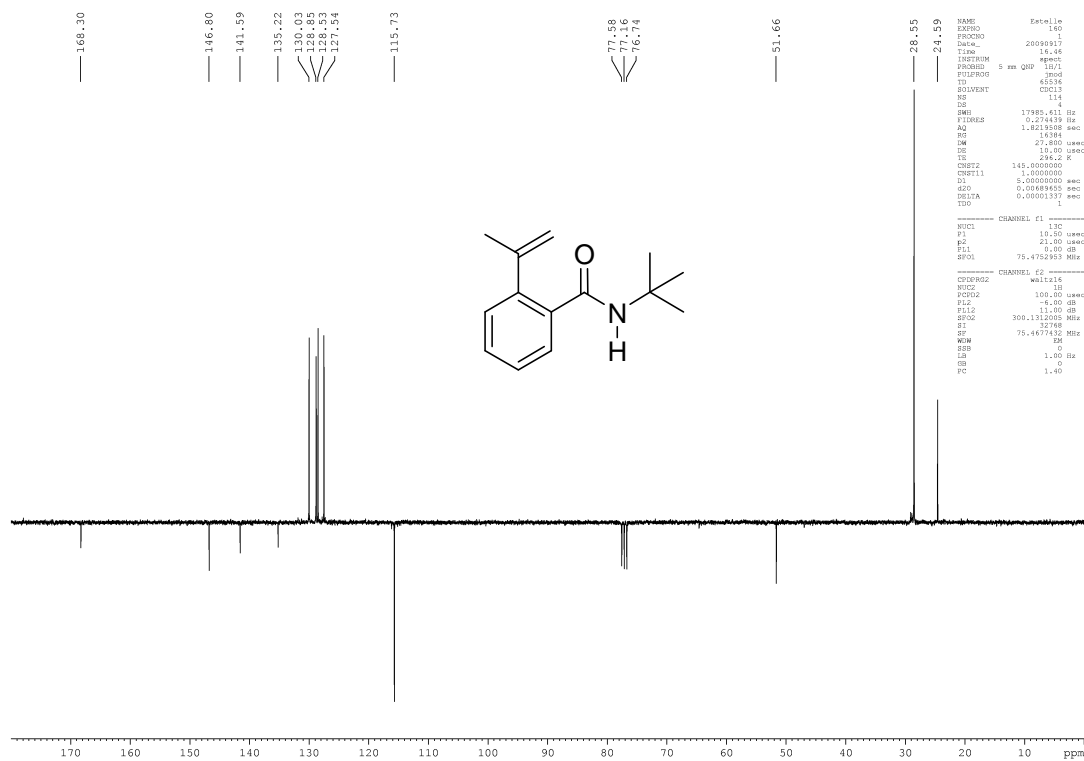



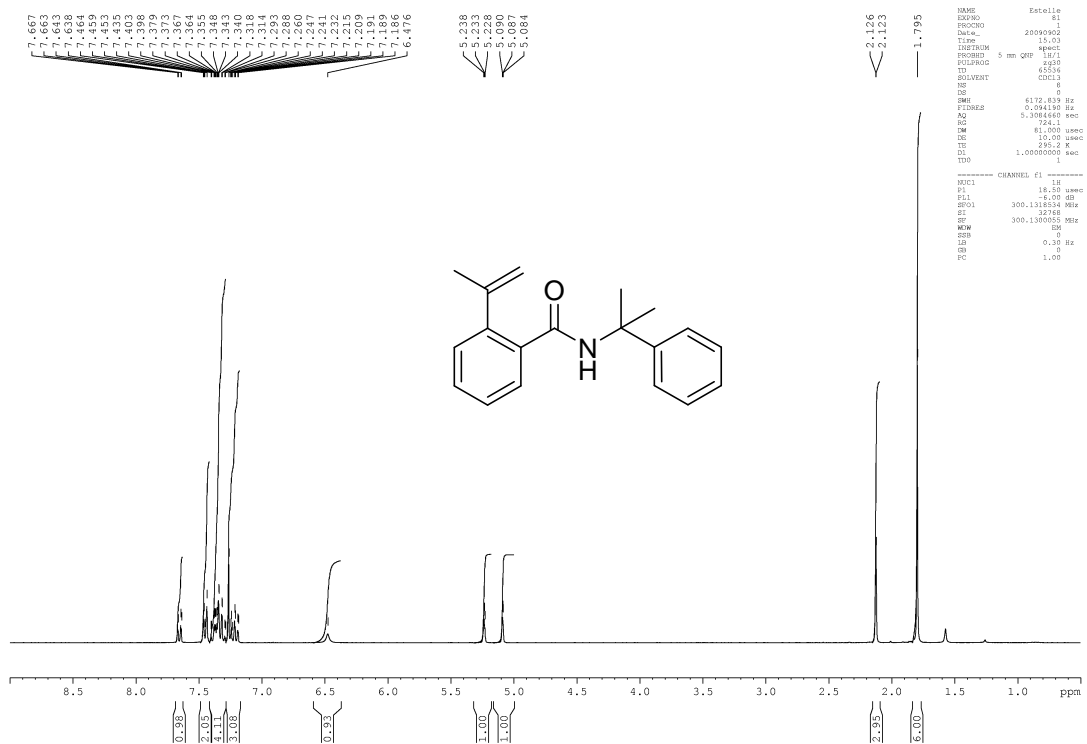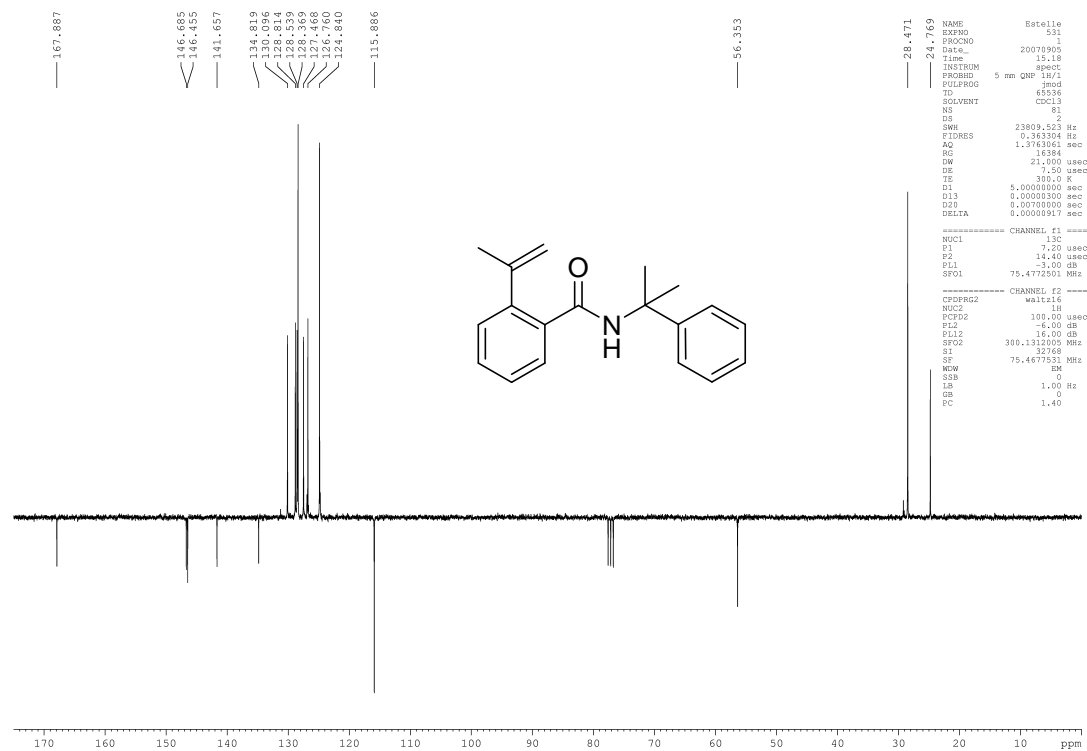

Supplement: c0cc01731k.pdf [file c0cc01731k.pdf]
